# Supplementary material
Source: MDPI journal article supplement (https://www.mdpi.com/1099-4300/24/4/439)
Supplement: s1 [file s1]

# Fast Whole-Genome Phylogeny by compression: the COVID-19 case

Rudi L. Cilibrasi and Paul M.B. Vitanyi

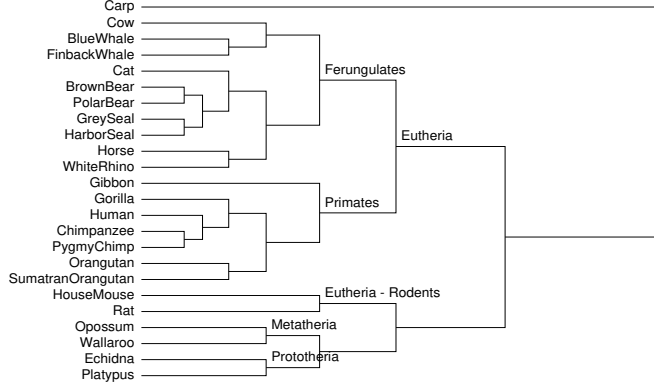

Figure S1. The evolutionary tree built from complete mammalian mtDNA sequences of 24 species, using the NCD matrix of Table SI. We have redrawn the tree from our output to agree better with the customary phylogeny tree format. The tree agrees exceptionally well with the NCD distance matrix:  $S(T) = 0.996$ .

## I. TWO EXAMPLES OF THE COMPRESSION METHOD

We treat two examples from [3] of the use of the Compression Method on known phylogenies.

The  $S(T)$  value in the caption of Figures SI and S2 tells how well the tree represents the  $n \times n$  NCD distance matrix of the  $n$  compared objects. To clarify, the  $n$  objects have  $n \times n$  NCD distances. Hence they exist in  $n$ -dimensional space. Mapping that space onto two dimensions gives distortions of those distances, whatever way you do this. A flat map representing the earth's sphere gives such problems. The Mercator projection is one way to do this with as consequence a particular distortion of the distances. In some areas this is a major distortion. A tree may represent the  $n \times n$  distances between  $n$  objects easier than a more demanding 2-dimensional map. The  $S(T)$  value tells how well these distances are preserved (0 is not at all and 1 is perfect). See how this is exactly calculated in reference [3].

### A. Mitochondrial DNA of 24 Species of Mammals

We use the mitochondrial DNA of the following species: rat (*Rattus norvegicus*), house mouse (*Mus musculus*), grey seal (*Halichoerus grypus*), harbor seal (*Phoca vitulina*), cat (*Felis catus*), white rhino (*Ceratotherium simum*), horse (*Equus caballus*), finback whale (*Balaenoptera physalus*), blue whale (*Balaenoptera musculus*), cow (*Bos taurus*), gibbon (*Hylobates lar*), gorilla (*Gorilla gorilla*), human (*Homo sapiens*), chimpanzee (*Pan troglodytes*), pygmy chimpanzee (*Pan paniscus*), orangutan (*Pongo pygmaeus*), Sumatran orangutan (*Pongo pygmaeus abelii*), using opossum (*Didelphis virginiana*), wallaroo (*Macropus robustus*), platypus (*Ornithorhynchus anatinus*), Australian echidna (*Tachyglossus aculeatus*), brown bear (*Ursus arctos*), polar bear (*Ursus maritimus*), using the common carp (*Cyprinus*

*carpio*) as the outgroup. We used the compressor PPMZ to obtain the NCD distance matrix in Table SI, and our quartet tree reconstruction method [4] to obtain the phylogeny tree Figure S2—that is, our own Complearn package [2].

The mitochondrial genomes of the total of 24 species we used were downloaded from the GenBank Database on the world-wide web. Each is around 17,000 bp. The resulting phylogeny, with an almost maximal  $S(T)$  score of 0.996 supports anew the currently accepted grouping (Rodents, (Primates, Ferungulates)) of the Eutherian orders [1] and additionally the Marsupionta hypothesis ((Prototheria, Metatheria), Eutheria), see Figure SI. Overall, our whole-mitochondrial NCD analysis supports the following hypothesis:

$$\overbrace{\left( \underbrace{((\text{primates}, \text{ferungulates})(\text{rodents}))}_{\text{Eutheria}}, (\text{Metatheria}, \text{Prototheria}) \right)}^{\text{Mammalia}},$$

which indicates that the rodents, and the branch leading to the Metatheria and Prototheria, split off early from the branch that led to the primates and ferungulates. Inspection of the distance matrix shows that the primates are very close together, as are the rodents, the Metatheria, and the Prototheria. These are tightly-knit groups with relatively close NCD's. The ferungulates are a much looser group with generally distant NCD's. The intergroup distances show that the Prototheria are furthest away from the other groups, followed by the Metatheria and the rodents. Also the fine-structure of the tree is consistent with biological wisdom.

### B. SARS Virus:

We clustered the SARS virus after its sequenced genome was made publicly available, in relation to potential similar virii. The 15 virus genomes were downloaded from The Universal Virus Database of the International Committee on Taxonomy of Viruses, available on the world-wide web. The SARS virus was downloaded from Canada's Michael Smith Genome Sciences Centre which had the first public SARS Coronavirus draft whole genome assembly available for download (SARS TOR2 draft genome assembly 120403). The NCD distance matrix was computed using the compressor bzip2. The relations in Figure S2 are similar to the definitive tree based on medical-macrobio-genomics analysis, appearing later in the New England Journal of Medicine, [5]. We depicted the figure in the ternary tree style, rather than the genomics-dendrogram style, since the former is more precise for visual inspection of proximity relations.

## REFERENCES

- [1] Y. Cao, A. Janke, P. J. Waddell, M. Westerman, O. Takenaka, S. Murata, N. Okada, S. Pbo, and M. Hasega, Conflict among individual mitochondrial proteins in resolving the phylogeny of Eutherian orders, *J. Mol. Evol.*, 47(1998), 307–322.
- [2] R.L. Cilibrasi, The CompLearn Toolkit, 2003–, [www.complearn.org](http://www.complearn.org)
- [3] R.L. Cilibrasi, P.M.B. Vitányi, Clustering by compression, *IEEE Trans. Information Theory*, 51:4(2005), 1523–1545.
- [4] R. Cilibrasi, P.M.B. Vitányi, A fast quartet tree heuristic for hierarchical clustering, *Pattern Recognition*, 44 (2011) 662–677.

|              | BlueWhale | BrownBear | Cat   | Chimpanzee | Echidna | Gorilla    | Horse | Opossum   | PolarBear  | SumOrang | WhiteRhino |       |       |       |       |       |       |       |       |       |       |       |       |       |
|--------------|-----------|-----------|-------|------------|---------|------------|-------|-----------|------------|----------|------------|-------|-------|-------|-------|-------|-------|-------|-------|-------|-------|-------|-------|-------|
|              |           | Carp      |       | Cow        | Gibbon  | HarborSeal | Human | Orangutan | PygmyChimp | Rat      | Wallaroo   |       |       |       |       |       |       |       |       |       |       |       |       |       |
| BlueWhale    | 0.005     | 0.906     | 0.943 | 0.897      | 0.925   | 0.883      | 0.936 | 0.616     | 0.928      | 0.931    | 0.901      | 0.898 | 0.896 | 0.926 | 0.920 | 0.936 | 0.928 | 0.929 | 0.907 | 0.930 | 0.927 | 0.929 | 0.925 | 0.902 |
| BrownBear    | 0.906     | 0.002     | 0.943 | 0.887      | 0.935   | 0.906      | 0.944 | 0.915     | 0.939      | 0.940    | 0.875      | 0.872 | 0.910 | 0.934 | 0.930 | 0.936 | 0.938 | 0.937 | 0.269 | 0.940 | 0.935 | 0.936 | 0.923 | 0.915 |
| Carp         | 0.943     | 0.943     | 0.006 | 0.946      | 0.954   | 0.947      | 0.955 | 0.952     | 0.951      | 0.957    | 0.949      | 0.950 | 0.952 | 0.956 | 0.946 | 0.956 | 0.953 | 0.954 | 0.945 | 0.960 | 0.950 | 0.953 | 0.942 | 0.960 |
| Cat          | 0.897     | 0.887     | 0.946 | 0.003      | 0.926   | 0.897      | 0.942 | 0.905     | 0.928      | 0.931    | 0.870      | 0.872 | 0.885 | 0.919 | 0.922 | 0.933 | 0.932 | 0.931 | 0.885 | 0.929 | 0.920 | 0.934 | 0.919 | 0.897 |
| Chimpanzee   | 0.925     | 0.935     | 0.954 | 0.926      | 0.006   | 0.926      | 0.948 | 0.926     | 0.849      | 0.731    | 0.925      | 0.922 | 0.921 | 0.943 | 0.667 | 0.943 | 0.841 | 0.946 | 0.931 | 0.441 | 0.933 | 0.835 | 0.934 | 0.930 |
| Cow          | 0.883     | 0.906     | 0.947 | 0.897      | 0.926   | 0.006      | 0.936 | 0.885     | 0.931      | 0.927    | 0.890      | 0.888 | 0.893 | 0.925 | 0.920 | 0.931 | 0.930 | 0.929 | 0.905 | 0.931 | 0.921 | 0.930 | 0.923 | 0.899 |
| Echidna      | 0.936     | 0.944     | 0.955 | 0.942      | 0.948   | 0.936      | 0.005 | 0.936     | 0.947      | 0.947    | 0.940      | 0.937 | 0.942 | 0.941 | 0.939 | 0.936 | 0.947 | 0.855 | 0.935 | 0.949 | 0.941 | 0.947 | 0.929 | 0.948 |
| FinbackWhale | 0.616     | 0.915     | 0.952 | 0.905      | 0.926   | 0.885      | 0.936 | 0.005     | 0.930      | 0.931    | 0.911      | 0.908 | 0.901 | 0.933 | 0.922 | 0.936 | 0.933 | 0.934 | 0.910 | 0.932 | 0.928 | 0.932 | 0.927 | 0.902 |
| Gibbon       | 0.928     | 0.939     | 0.951 | 0.928      | 0.849   | 0.931      | 0.947 | 0.930     | 0.005      | 0.859    | 0.932      | 0.930 | 0.927 | 0.948 | 0.844 | 0.951 | 0.872 | 0.952 | 0.936 | 0.854 | 0.939 | 0.868 | 0.933 | 0.929 |
| Gorilla      | 0.931     | 0.940     | 0.957 | 0.931      | 0.731   | 0.927      | 0.947 | 0.931     | 0.859      | 0.006    | 0.927      | 0.929 | 0.924 | 0.944 | 0.737 | 0.944 | 0.835 | 0.943 | 0.928 | 0.732 | 0.938 | 0.836 | 0.934 | 0.929 |
| GreySeal     | 0.901     | 0.875     | 0.949 | 0.870      | 0.925   | 0.890      | 0.940 | 0.911     | 0.932      | 0.927    | 0.003      | 0.399 | 0.888 | 0.924 | 0.922 | 0.933 | 0.931 | 0.936 | 0.863 | 0.929 | 0.922 | 0.930 | 0.920 | 0.898 |
| HarborSeal   | 0.898     | 0.872     | 0.950 | 0.872      | 0.922   | 0.888      | 0.937 | 0.908     | 0.930      | 0.929    | 0.399      | 0.004 | 0.888 | 0.922 | 0.922 | 0.933 | 0.932 | 0.937 | 0.860 | 0.930 | 0.922 | 0.928 | 0.919 | 0.900 |
| Horse        | 0.896     | 0.910     | 0.952 | 0.885      | 0.921   | 0.893      | 0.942 | 0.901     | 0.927      | 0.924    | 0.888      | 0.888 | 0.003 | 0.928 | 0.913 | 0.937 | 0.923 | 0.936 | 0.903 | 0.923 | 0.912 | 0.924 | 0.924 | 0.848 |
| HouseMouse   | 0.926     | 0.934     | 0.956 | 0.919      | 0.943   | 0.925      | 0.941 | 0.933     | 0.948      | 0.944    | 0.924      | 0.922 | 0.928 | 0.006 | 0.932 | 0.923 | 0.944 | 0.930 | 0.924 | 0.942 | 0.860 | 0.945 | 0.921 | 0.928 |
| Human        | 0.920     | 0.930     | 0.946 | 0.922      | 0.667   | 0.920      | 0.939 | 0.922     | 0.844      | 0.737    | 0.922      | 0.922 | 0.913 | 0.932 | 0.005 | 0.949 | 0.834 | 0.949 | 0.931 | 0.681 | 0.938 | 0.826 | 0.934 | 0.929 |
| Opossum      | 0.936     | 0.936     | 0.956 | 0.933      | 0.943   | 0.931      | 0.936 | 0.936     | 0.951      | 0.944    | 0.933      | 0.933 | 0.937 | 0.923 | 0.949 | 0.006 | 0.960 | 0.938 | 0.939 | 0.954 | 0.941 | 0.960 | 0.891 | 0.952 |
| Orangutan    | 0.928     | 0.938     | 0.953 | 0.932      | 0.841   | 0.930      | 0.947 | 0.933     | 0.872      | 0.835    | 0.931      | 0.932 | 0.923 | 0.944 | 0.834 | 0.960 | 0.006 | 0.954 | 0.933 | 0.843 | 0.943 | 0.585 | 0.945 | 0.934 |
| Platypus     | 0.929     | 0.937     | 0.954 | 0.931      | 0.946   | 0.929      | 0.855 | 0.934     | 0.952      | 0.943    | 0.936      | 0.937 | 0.936 | 0.930 | 0.949 | 0.938 | 0.954 | 0.003 | 0.932 | 0.948 | 0.937 | 0.949 | 0.920 | 0.948 |
| PolarBear    | 0.907     | 0.269     | 0.945 | 0.885      | 0.931   | 0.905      | 0.935 | 0.910     | 0.936      | 0.928    | 0.863      | 0.860 | 0.903 | 0.924 | 0.931 | 0.939 | 0.933 | 0.932 | 0.002 | 0.942 | 0.940 | 0.936 | 0.927 | 0.917 |
| PygmyChimp   | 0.930     | 0.940     | 0.960 | 0.929      | 0.441   | 0.931      | 0.949 | 0.932     | 0.854      | 0.732    | 0.929      | 0.930 | 0.923 | 0.942 | 0.681 | 0.954 | 0.843 | 0.948 | 0.942 | 0.007 | 0.935 | 0.838 | 0.931 | 0.929 |
| Rat          | 0.927     | 0.935     | 0.950 | 0.920      | 0.933   | 0.921      | 0.941 | 0.928     | 0.939      | 0.938    | 0.922      | 0.922 | 0.912 | 0.860 | 0.938 | 0.941 | 0.943 | 0.937 | 0.940 | 0.935 | 0.006 | 0.939 | 0.922 | 0.922 |
| SumOrangutan | 0.929     | 0.936     | 0.953 | 0.934      | 0.835   | 0.930      | 0.947 | 0.932     | 0.868      | 0.836    | 0.930      | 0.928 | 0.924 | 0.945 | 0.826 | 0.960 | 0.585 | 0.949 | 0.936 | 0.838 | 0.939 | 0.007 | 0.942 | 0.937 |
| Wallaroo     | 0.925     | 0.923     | 0.942 | 0.919      | 0.934   | 0.923      | 0.929 | 0.927     | 0.933      | 0.934    | 0.920      | 0.919 | 0.924 | 0.921 | 0.934 | 0.891 | 0.945 | 0.920 | 0.927 | 0.931 | 0.922 | 0.942 | 0.005 | 0.935 |
| WhiteRhino   | 0.902     | 0.915     | 0.960 | 0.897      | 0.930   | 0.899      | 0.948 | 0.902     | 0.929      | 0.929    | 0.898      | 0.900 | 0.848 | 0.928 | 0.929 | 0.952 | 0.934 | 0.948 | 0.917 | 0.929 | 0.922 | 0.937 | 0.935 | 0.002 |

Table S1.

DISTANCE MATRIX OF PAIRWISE NCD. FOR DISPLAY PURPOSES, WE HAVE TRUNCATED THE ORIGINAL ENTRIES FROM 15 DECIMALS TO 3 DECIMALS PRECISION.

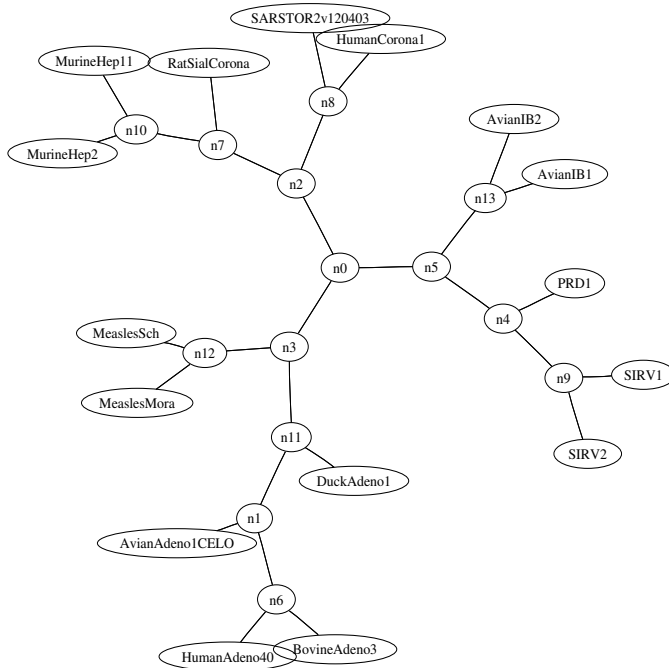

Figure S2. SARS virus among other viruses. Legend: AvianAdeno1CELO.inp: Fowl adenovirus 1; AvianIB1.inp: Avian infectious bronchitis virus (strain Beaudette US); AvianIB2.inp: Avian infectious bronchitis virus (strain Beaudette CK); BovineAdeno3.inp: Bovine adenovirus 3; DuckAdeno1.inp: Duck adenovirus 1; HumanAdeno40.inp: Human adenovirus type 40; HumanCorona1.inp: Human coronavirus 229E; MeaslesMora.inp: Measles virus strain Moraten; MeaslesSch.inp: Measles virus strain Schwarz; MurineHep11.inp: Murine hepatitis virus strain ML-11; MurineHep2.inp: Murine hepatitis virus strain 2; PRD1.inp: Enterobacteria phage PRD1; RatSialCorona.inp: Rat sialodacryoadenitis coronavirus; SARS.inp: SARS TOR2v120403; SIRV1.inp: Sulfolobus virus SIRV-1; SIRV2.inp: Sulfolobus virus SIRV-2.  $S(T) = 0.988$ .

## II. DETAILS OF THE DATA-CLEANING PROCEDURE OF THE GISAID DATA IN THE MAIN TEXT

On the sequences initially downloaded from GISAID, we applied a lowercase transformation to each to reduce pointless variability. After that, we computed a histogram of all the characters in the sequence and counted the size of each group. Many sequences contained the base pairs A, C, G, N, T or other letters. We retained the viruses in the list after deduplication and filtering for A,C,G,T. This reduced the GISAID download to a set of unique 15,578 sequences with the known nucleotides A,C,G, and T. Each viral sequence is an RNA sequence and is around 30,000 RNA base pairs in size. The total size of all sequence data together is in the order of two gigabyte.

We then looked at whether there was much variation among the SARS-CoV-2 viruses themselves since this may invalidate the NCD distance between the inspected viruses and the selected SARS-CoV-2 virus. The worst NCD against the selected SARS-CoV-2 virus was 0.874027 namely gisaid hcov-19 2020 07 17 22.fasta;hCoV-19/pangolin/Guangxi/P1E/2017 EPI ISL 410539/2017 from a Pangolin. Removing that one sequence from the list we got a worst NCD of 0.873367 also from a Pangolin in 2017.

Initially there are 15,430 sequences from GISAID that contain “hCov” in the name. We removed all sequences that contained /2017 in the name. After this we were left with 15,428 sequences and obtained a worst NCD of 0.738175 also from a Pangolin.

Removing the 21 sequences that contained /2017, /2018, or /2019 in the name, partially from Pangolins and possibly misclassified according to the 2020 criteria since the SARS-CoV-2 virus was only established in 2020, left 15,409 viruses in the list.

To clarify why there is the discrepancy below in that we obtain 15,578 imported sequences but when counting lose 100–200 in the next phase: There are some exact name duplicates in the GISAID data. When the “imported sequence” count is reported, then we count identically named identical sequences separately because they did both get imported (but one would overwrite the other). When counting the different names for sequences without /2017, /2018, /2019 in the name, these exact-name duplicates would collapse into a single one causing just one count.

[5] T.G. Ksiazek, et al., A Novel Coronavirus Associated with Severe Acute Respiratory Syndrome, *New England J. Medicine*, Published at www.nejm.org April 10, 2003 (10.1056/NEJMoa030781).

### III. NCD DISTANCE MATRIX UNDERLYING FIGURE 1 IN THE MAIN BODY OF THE PAPER

|                            |                            |                         |                         |
|----------------------------|----------------------------|-------------------------|-------------------------|
| DQ648856_Riboviria_3100    | 0.00344923                 | 0.995585                | 0.789459                |
| 0.788631                   | 0.700883                   | 0.790701                | 0.787804                |
| 0.995632                   | 0.793598                   | 0.78739                 | 0.932947                |
| 0.761714                   | 0.795812                   | 0.995632                | 0.941225                |
| 0.788769                   | 0.784622                   | 0.995344                | 0.788217                |
| 0.787666                   | 0.78739                    | 0.789321                | 0.795674                |
| 0.890453                   | 0.796554                   | 0.994546                | 0.933223                |
| 0.785084                   | 0.793684                   | 0.795674                | 0.788217                |
| 0.789321                   | 0.791391                   | 0.790011                | 0.812259                |
| 0.791898                   | 0.76975                    | 0.796278                | 0.804912                |
| 0.995447                   | 0.789873                   | 0.797022                | 0.793279                |
| 0.995477                   | 0.931153                   | 0.0862188               | 0.788907                |
| 0.787804                   | 0.995344                   | 0.796554                | 0.893902                |
| 0.790563                   | 0.795755                   | 0.997517                | 0.99531                 |
| 0.788907                   | 0.788493                   | 0.791805                | 0.787666                |
| 0.78739                    | FJ938057_Coronaviridae_734 | 0.995585                | 0.00353107              |
| 0.995284                   | 0.995305                   | 0.996109                | 0.994992                |
| 0.99544                    | 0.995632                   | 0.995292                | 0.995306                |
| 0.99611                    | 0.995452                   | 0.995591                | 0.995495                |
| 0.995235                   | 0.995028                   | 0.995315                | 0.99561                 |
| 0.995029                   | 0.995166                   | 0.995169                | 0.995159                |
| 0.995591                   | 0.995843                   | 0.995589                | 0.995975                |
| 0.995265                   | 0.995313                   | 0.995449                | 0.995591                |
| 0.995166                   | 0.995146                   | 0.995306                | 0.995167                |
| 0.995179                   | 0.995258                   | 0.99545                 | 0.995589                |
| 0.995266                   | 0.99548                    | 0.995167                | 0.99545                 |
| 0.995317                   | 0.99561                    | 0.99542                 | 0.995586                |
| 0.995303                   | 0.995306                   | 0.99561                 | 0.995451                |
| 0.99611                    | 0.995306                   | 0.995452                | 0.99774                 |
| 0.995448                   | 0.995146                   | 0.995166                | 0.995155                |
| 0.995167                   | 0.995169                   | EU371562_Riboviria_3206 | 0.789873                |
| 0.995839                   | 0.00332871                 | 0.0129816               | 0.769764                |
| 0.0134535                  | 0.0375483                  | 0.995768                | 0.0470849               |
| 0.0289895                  | 0.921637                   | 0.776185                | 0.788509                |
| 0.995768                   | 0.937864                   | 0.0277586               | 0.391897                |
| 0.995211                   | 0.0280309                  | 0.0301063               | 0.0284334               |
| 0.0283541                  | 0.78782                    | 0.880698                | 0.790076                |
| 0.994676                   | 0.920111                   | 0.391508                | 0.791063                |
| 0.78782                    | 0.0256871                  | 0.00582443              | 0.0695748               |
| 0.0345209                  | 0.688981                   | 0.407533                | 0.767958                |
| 0.790076                   | 0.666158                   | 0.9957                  | 0.0401823               |
| 0.789989                   | 0.789836                   | 0.995211                | 0.917892                |
| 0.790868                   | 0.0320486                  | 0.0299558               | 0.995078                |
| 0.787043                   | 0.877393                   | 0.0503865               | 0.790794                |
| 0.997642                   | 0.995448                   | 0.00721221              | 0.0262395               |
| 0.0365449                  | 0.0247169                  | 0.0266391               | EU371560_Riboviria_3204 |
| 0.789045                   | 0.995857                   | 0.012291                | 0.00331446              |
| 0.770336                   | 0.0187819                  | 0.0314743               | 0.995768                |
| 0.0436404                  | 0.0229155                  | 0.921558                | 0.77591                 |
| 0.787958                   | 0.995768                   | 0.93813                 | 0.0214059               |
| 0.39176                    | 0.995211                   | 0.0218172               | 0.0238917               |
| 0.0222222                  | 0.0233393                  | 0.787269                | 0.880956                |
| 0.789524                   | 0.994806                   | 0.920177                | 0.391508                |
| 0.790787                   | 0.787269                   | 0.0197487               | 0.0111863               |
| 0.0647432                  | 0.0283071                  | 0.688567                | 0.407939                |
| 0.767682                   | 0.789524                   | 0.667449                | 0.995719                |
| 0.0339685                  | 0.789437                   | 0.789561                | 0.995211                |
| 0.917829                   | 0.790178                   | 0.0263776               | 0.0234677               |
| 0.995211                   | 0.786768                   | 0.878056                | 0.0443125               |
| 0.790243                   | 0.997514                   | 0.995448                | 0.00828615              |
| 0.0198868                  | 0.0325922                  | 0.018227                | 0.0202899               |
| JX993987_Coronaviridae_778 | 0.698675                   | 0.995832                | 0.767684                |
| 0.76854                    | 0.00347367                 | 0.768654                | 0.766703                |
| 0.995768                   | 0.769561                   | 0.767118                | 0.930119                |
| 0.705347                   | 0.757371                   | 0.995768                | 0.938586                |
| 0.76785                    | 0.770566                   | 0.995344                | 0.768158                |
| 0.766745                   | 0.767288                   | 0.76722                 | 0.757647                |
| 0.874879                   | 0.759201                   | 0.994936                | 0.926497                |
| 0.772126                   | 0.755896                   | 0.755993                | 0.767435                |
| 0.767577                   | 0.772639                   | 0.769401                | 0.785813                |
| 0.778756                   | 0.699435                   | 0.759201                | 0.772544                |
| 0.995832                   | 0.769815                   | 0.758687                | 0.7                     |

0.00331309 0.995632 0.0433462 0.0168415 0.92159 0.775358  
0.786994 0.995632 0.937742 0.0215351 0.389142 0.995078  
0.021397 0.0175318 0.0186335 0.0229155 0.786305 0.880453  
0.78856 0.994676 0.920348 0.389302 0.78996 0.786443 0.0198785  
0.03672 0.057979 0.0277471 0.687328 0.405636 0.767544 0.78856  
0.66455 0.995721 0.0338211 0.78861 0.788734 0.995078 0.917863  
0.789212 0.0173937 0.0229155 0.995078 0.786216 0.877554  
0.0437604 0.78914 0.997515 0.99531 0.0369961 0.0200166  
0.0320265 0.0200166 0.0194617 EF065506\_Riboviria\_3120  
0.995359 0.995495 0.995359 0.995359 0.995768 0.995359  
0.995495 0.0034125 0.995359 0.995359 0.995632 0.995905  
0.995222 0.004914 0.995086 0.995086 0.995086 0.977917  
0.995222 0.995222 0.995086 0.995222 0.995222 0.995768 0.995359  
0.995195 0.994949 0.995086 0.995222 0.995222 0.995222 0.995222  
0.995359 0.995359 0.995086 0.995123 0.995632 0.995222 0.995086  
0.995086 0.995359 0.995222 0.995086 0.977917 0.994949 0.995359  
0.995222 0.995222 0.977784 0.995086 0.996041 0.995359 0.995359  
0.997679 0.97775 0.995359 0.995222 0.995359 0.995359 0.995222  
FJ882954\_Coronaviridae\_725 0.794012 0.995707 0.0475003  
0.0446071 0.771777 0.0504085 0.0436223 0.995768 0.00318515  
0.0350635 0.923695 0.781836 0.792505 0.995632 0.940036  
0.0335589 0.398236 0.995078 0.0280309 0.0343875 0.036853  
0.0323651 0.791816 0.882149 0.794073 0.994546 0.92051  
0.398263 0.795063 0.791816 0.0320398 0.046254 0.0771673  
0.0403204 0.695317 0.413901 0.773473 0.794073 0.668467  
0.995568 0.0252693 0.79385 0.79383 0.995211 0.919679  
0.794592 0.0375743 0.0354776 0.995078 0.791316 0.878964  
0.0339591 0.794653 0.997507 0.995172 0.0466694 0.032316  
0.0185493 0.0321734 0.0321601 AY864805\_Riboviria\_3030  
0.787528 0.995859 0.0282993 0.0230536 0.768636 0.0307841  
0.0160133 0.995632 0.0342352 0.00317504 0.921452 0.774118  
0.785754 0.995632 0.937604 0.0118719 0.383767 0.995211  
0.0111817 0.00745445 0.00538302 0.0133904 0.785065 0.880177  
0.787319 0.994806 0.920072 0.383926 0.788857 0.785203  
0.0100773 0.0276091 0.0524572 0.0180839 0.68595 0.400488  
0.766304 0.787319 0.66386 0.995721 0.0241579 0.787369  
0.787633 0.995211 0.917587 0.788523 0.00869685 0.0125621  
0.995078 0.7847 0.877278 0.0345113 0.788037 0.997653 0.995586  
0.0278851 0.0100773 0.0223633 0.00980121 0.00910973 Beta-  
CoV\_bat\_Yunnan\_RaTG13\_2013—EPI\_ISL\_402131\_EPI\_ISL\_402131  
0.931843 0.995554 0.919834 0.920039 0.929008 0.920395 0.91952  
0.995086 0.922448 0.919796 0.00361211 0.930402 0.927115  
0.995086 0.95207 0.920453 0.917183 0.995078 0.919912 0.919348  
0.920083 0.920609 0.92739 0.793543 0.927085 0.995066 0.443873  
0.917149 0.926907 0.927253 0.919624 0.919567 0.921314  
0.920188 0.918457 0.918846 0.929409 0.927223 0.924146  
0.995276 0.920326 0.926917 0.926319 0.995078 0.441083 0.931853  
0.919464 0.919796 0.995078 0.925706 0.793027 0.920486 0.926957  
0.997638 0.995034 0.919556 0.919762 0.921096 0.919774 0.919393  
DQ412043\_Riboviria\_3074 0.763782 0.995728 0.775358 0.775221  
0.707001 0.776874 0.774531 0.995768 0.780871 0.773567 0.931229  
0.00330761 0.747313 0.995768 0.938396 0.774945 0.768362  
0.995211 0.775221 0.774118 0.773429 0.776461 0.746487 0.877343  
0.748897 0.995066 0.92737 0.773291 0.741869 0.747589 0.774118  
0.775634 0.779355 0.775083 0.789807 0.780111 0.0624311  
0.748897 0.787073 0.995452 0.77715 0.748484 0.740256 0.995344  
0.925579 0.727398 0.775358 0.77398 0.995211 0.747106 0.883958  
0.778115 0.749173 0.997519 0.995039 0.774945 0.774118 0.778942  
0.774118 0.773705 GQ153540\_Coronaviridae\_748 0.793883  
0.995729 0.788785 0.788509 0.757647 0.7903 0.78782 0.995632  
0.793194 0.788656 0.927115 0.746349 0.0033067 0.995495  
0.938551 0.788647 0.782447 0.995211 0.787545 0.786856 0.787407  
0.788647 0.0121246 0.807798 0.0166713 0.994546 0.926564

|                                                                |                                                                |
|----------------------------------------------------------------|----------------------------------------------------------------|
| 0.783274 0.291678 0.013089 0.78782 0.788647 0.79154 0.789198   | AY278554_Riboviria_2953 0.787804 0.995857 0.0295539            |
| 0.799725 0.789459 0.73946 0.0158446 0.798154 0.995729 0.788923 | 0.0241679 0.768264 0.0317636 0.0171176 0.995632 0.033697       |
| 0.0203913 0.289354 0.995211 0.924773 0.793331 0.788509         | 0.00759249 0.921005 0.774807 0.785891 0.995632 0.93744         |
| 0.787545 0.995211 0.129788 0.835079 0.790025 0.0151557         | 0.0124292 0.383767 0.995211 0.0110467 0.00317636 0.00952381    |
| 0.997658 0.99504 0.788371 0.78782 0.790438 0.787269 0.787269   | 0.0140865 0.785203 0.880127 0.787319 0.994676 0.919624         |
| EF065507_Riboviria_3121 0.995359 0.995495 0.995359 0.995359    | 0.383926 0.788857 0.785203 0.0106339 0.0287253 0.0521811       |
| 0.995768 0.995222 0.995495 0.0047775 0.995222 0.995222         | 0.0191936 0.685813 0.400352 0.766993 0.787595 0.663444         |
| 0.995632 0.995768 0.995222 0.003276 0.995086 0.994949 0.995086 | 0.995719 0.0240265 0.787507 0.787633 0.995211 0.917139 0.78935 |
| 0.977784 0.995222 0.995222 0.995086 0.995222 0.995222 0.995768 | 0.010772 0.0139426 0.995078 0.784976 0.877227 0.0345113        |
| 0.995359 0.995066 0.994813 0.995086 0.995222 0.995222 0.995086 | 0.788175 0.997514 0.995448 0.0290015 0.010772 0.0220964        |
| 0.995086 0.995359 0.995222 0.995086 0.994987 0.995632 0.995222 | 0.0109086 0.01049 AY864806_Riboviria_3031 0.787666 0.995859    |
| 0.995086 0.994949 0.995222 0.995222 0.995086 0.977784 0.994949 | 0.0277433 0.0223602 0.768668 0.0298137 0.0179434 0.995632      |
| 0.995359 0.995222 0.995222 0.977784 0.995086 0.995905 0.995222 | 0.0360248 0.00510697 0.921739 0.774118 0.786167 0.995632       |
| 0.995222 0.997543 0.97775 0.995359 0.995086 0.995222 0.995222  | 0.937474 0.0138026 0.38487 0.995078 0.0129745 0.00938578       |
| 0.995222 NC_014470_Coronaviridae_823 0.940535 0.995656         | 0.0031746 0.0153209 0.785616 0.880607 0.78787 0.994546         |
| 0.935645 0.93592 0.939419 0.935596 0.935395 0.995632 0.938097  | 0.920497 0.384753 0.789133 0.785616 0.0118703 0.0269151        |
| 0.935533 0.952487 0.938534 0.939239 0.995632 0.00336323        | 0.0539683 0.0198758 0.686639 0.401165 0.766441 0.787733        |
| 0.936197 0.938404 0.994945 0.935791 0.935368 0.935404 0.936653 | 0.664596 0.995721 0.0258109 0.787921 0.787908 0.995078         |
| 0.939102 0.946377 0.939628 0.994806 0.953621 0.938379 0.935733 | 0.918012 0.788661 0.01049 0.0144928 0.995078 0.785389 0.877709 |
| 0.939239 0.935506 0.935377 0.935809 0.935653 0.938567 0.939439 | 0.0360248 0.788451 0.997516 0.995448 0.0271912 0.0120083       |
| 0.937543 0.939628 0.945419 0.995235 0.936067 0.939741 0.935408 | 0.0242926 0.0115942 0.010766 FJ882963_Coronaviridae_726        |
| 0.994945 0.951978 0.940268 0.935626 0.935671 0.994945 0.93756  | 0.789321 0.995712 0.0278008 0.0238917 0.768603 0.0298755       |
| 0.946381 0.936637 0.939636 0.997758 0.994897 0.935506 0.935506 | 0.0227775 0.995768 0.0318119 0.0136665 0.921992 0.777012       |
| 0.937016 0.935653 0.935542 AY357076_Riboviria_2980 0.788769    | 0.78782 0.995768 0.938589 0.0125673 0.388728 0.995211          |
| 0.995719 0.0265157 0.0209916 0.769507 0.0285872 0.0204307      | 0.0122894 0.0142246 0.015597 0.00318119 0.787131 0.880636      |
| 0.995632 0.0325922 0.0110436 0.921972 0.775358 0.787269        | 0.789524 0.994676 0.919502 0.388751 0.79065 0.787131           |
| 0.995632 0.938268 0.00317636 0.386937 0.995211 0.009942        | 0.010772 0.0266943 0.0570127 0.0187793 0.68843 0.404146        |
| 0.0117387 0.0129745 0.0117387 0.78658 0.881232 0.788835        | 0.768923 0.789524 0.663347 0.995712 0.0249931 0.789437         |
| 0.994676 0.920729 0.387097 0.789684 0.786718 0.00690512        | 0.789423 0.995344 0.918396 0.79004 0.0161625 0.0142187         |
| 0.0251346 0.0559083 0.0168462 0.687603 0.403604 0.767407       | 0.995211 0.78663 0.878008 0.0354776 0.789967 0.99751           |
| 0.788835 0.665516 0.995581 0.0227838 0.788886 0.788459         | 0.995448 0.0272476 0.0109101 0.020332 0.0110467 0.01049        |
| 0.995211 0.918105 0.789764 0.0142246 0.0114578 0.995078        | GQ153539_Coronaviridae_747 0.793607 0.995729 0.788371          |
| 0.785941 0.878194 0.0332689 0.789416 0.997514 0.995448         | 0.788234 0.757647 0.789611 0.787407 0.995632 0.792643 0.786443 |
| 0.0258252 0.00704323 0.0208535 0.00731842 0.00786749           | 0.927528 0.745798 0.0122623 0.995632 0.938413 0.788234 0.78286 |
| KC881005_Coronaviridae_782 0.785035 0.995728 0.392173          | 0.995211 0.787131 0.78658 0.786718 0.788234 0.0033067 0.807798 |
| 0.392173 0.771255 0.394102 0.389831 0.995632 0.398787          | 0.0238358 0.994676 0.926839 0.783825 0.291816 0.0121246        |
| 0.384594 0.917872 0.768362 0.780794 0.995632 0.938955          | 0.787545 0.788234 0.791127 0.788785 0.799725 0.78973 0.738771  |
| 0.388177 0.00316935 0.995078 0.386386 0.384594 0.385559        | 0.0231469 0.79898 0.995729 0.788509 0.0271425 0.289492         |
| 0.389417 0.781207 0.878876 0.782279 0.994416 0.919113 0.131735 | 0.995344 0.925048 0.792918 0.788096 0.787131 0.995344 0.131166 |
| 0.781452 0.781207 0.386386 0.392449 0.396583 0.388866 0.67686  | 0.835079 0.789611 0.022458 0.997658 0.99504 0.787958 0.787545  |
| 0.156076 0.760783 0.782417 0.655092 0.995728 0.39176 0.782141  | 0.790163 0.786856 0.786718 MG772933.1_bat_SL_CoVZC45           |
| 0.779645 0.995211 0.916494 0.78848 0.388315 0.387075 0.995078  | 0.888245 0.995566 0.880837 0.881232 0.872662 0.88153 0.880039  |
| 0.779523 0.881218 0.396031 0.783106 0.997382 0.995177 0.391897 | 0.995632 0.882011 0.880039 0.79285 0.876516 0.805732 0.995632  |
| 0.386523 0.392724 0.385559 0.385697 EF065510_Riboviria_3124    | 0.945684 0.881094 0.8786 0.995211 0.880282 0.879851 0.880469   |
| 0.995876 0.996408 0.99561 0.99561 0.996275 0.995477 0.99561    | 0.880636 0.805594 0.00374117 0.806892 0.994676 0.785922        |
| 0.979247 0.995477 0.99561 0.996541 0.996009 0.995876 0.979247  | 0.879101 0.801958 0.806283 0.880403 0.880698 0.882109 0.881248 |
| 0.995743 0.995344 0.995876 0.00305973 0.995477 0.995477        | 0.889532 0.881994 0.875086 0.80703 0.888181 0.995427 0.88111   |
| 0.995477 0.995477 0.995876 0.996408 0.996009 0.995715          | 0.806536 0.801405 0.995344 0.783567 0.883846 0.880094          |
| 0.995876 0.995743 0.995743 0.995876 0.995477 0.995344 0.99561  | 0.880177 0.995344 0.811854 0.306499 0.881419 0.806643          |
| 0.995477 0.995344 0.99561 0.996009 0.996009 0.99561 0.996408   | 0.997506 0.994621 0.88056 0.880403 0.881506 0.880144 0.880193  |
| 0.995477 0.995876 0.99561 0.00744978 0.995876 0.995876         | GQ153545_Coronaviridae_753 0.794349 0.995727 0.790351          |
| 0.995477 0.995477 0.00518824 0.99561 0.996275 0.995477         | 0.790076 0.759476 0.791868 0.789387 0.995632 0.794762 0.788284 |
| 0.995876 0.997605 0.978981 0.99561 0.995477 0.995477 0.99561   | 0.92736 0.748071 0.0163957 0.995495 0.938939 0.790076 0.783933 |
| 0.995477 AY278741_Riboviria_2954 0.788355 0.995719 0.0274786   | 0.995211 0.788973 0.788422 0.788835 0.790214 0.0234224         |
| 0.0220933 0.769539 0.0302403 0.0211209 0.995768 0.0270643      | 0.808959 0.00330806 0.994676 0.926533 0.784562 0.296347        |
| 0.0111817 0.921569 0.775772 0.78658 0.995632 0.937724          | 0.0245247 0.789524 0.790076 0.793108 0.790627 0.80124          |
| 0.0107705 0.385834 0.995078 0.003314 0.0110467 0.0131125       | 0.790814 0.741006 0.00399724 0.799035 0.995727 0.790489        |
| 0.0117371 0.785891 0.88042 0.788146 0.994676 0.919635 0.38627  | 0.0226051 0.294037 0.995344 0.924879 0.793522 0.789938         |
| 0.789822 0.785891 0.00883734 0.0263739 0.0560464 0.0167081     | 0.788973 0.995211 0.136733 0.835975 0.791454 0.0115766         |
| 0.686639 0.402655 0.76782 0.788146 0.664181 0.995581 0.0169843 | 0.997657 0.995038 0.7898 0.789249 0.792006 0.788835 0.788697   |
| 0.788196 0.788459 0.995211 0.917426 0.78935 0.014913 0.0115958 | NC_025217_Coronaviridae_835 0.994546 0.996234 0.994546         |
| 0.995078 0.785527 0.877244 0.0276091 0.788727 0.997514         | 0.994416 0.995325 0.994416 0.994546 0.995585 0.994416 0.994416 |
| 0.99531 0.0269263 0.00897542 0.0150511 0.00842309 0.00814355   | 0.995585 0.995195 0.994936 0.995585 0.994936 0.994286 0.994157 |

|                            |                            |                                    |                            |            |            |           |                            |                            |            |                            |            |            |
|----------------------------|----------------------------|------------------------------------|----------------------------|------------|------------|-----------|----------------------------|----------------------------|------------|----------------------------|------------|------------|
| 0.995325                   | 0.994286                   | 0.994416                           | 0.994286                   | 0.994416   | 0.994936   | 0.995325  | 0.0284373                  | 0.995078                   | 0.787043   | 0.87741                    | 0.0490061  | 0.790518   |
| 0.995066                   | 0.00337618                 | 0.994676                           | 0.994286                   | 0.994806   | 0.995066   |           | 0.997504                   | 0.99531                    | 0.00610179 | 0.0248584                  | 0.035299   | 0.023198   |
| 0.994286                   | 0.994286                   | 0.994546                           | 0.994416                   | 0.994157   | 0.994157   | 0.994936  | 0.0252588                  | AY515512_Riboviria_2987    |            | 0.791943                   |            | 0.995721   |
| 0.995066                   | 0.994416                   | 0.996364                           | 0.994286                   | 0.995066   | 0.994676   | 0.995325  | 0.0697129                  | 0.0651574                  | 0.773192   | 0.0717835                  | 0.057979   | 0.995632   |
| 0.994936                   | 0.994546                   | 0.994416                           | 0.994286                   | 0.995325   | 0.994936   | 0.995066  | 0.076339                   | 0.0530094                  | 0.922281   | 0.779906                   | 0.790989   | 0.995632   |
| 0.994286                   | 0.995066                   | 0.997792                           | 0.995455                   | 0.994546   | 0.994416   | 0.994286  | 0.937604                   | 0.0567366                  | 0.395618   | 0.995211                   | 0.0565986  | 0.0527333  |
| 0.994286                   | 0.994416                   | selected_SARS_CoV_2_EPI_ISL_471246 |                            |            |            |           | 0.0546584                  | 0.0574268                  | 0.790163   | 0.882385                   | 0.792557   | 0.994676   |
| 0.932533                   | 0.994986                   | 0.918724                           | 0.919072                   | 0.925802   | 0.919182   | 0.918691  | 0.921452                   | 0.396333                   | 0.792718   | 0.7903                     | 0.054804   | 0.0688846  |
| 0.995086                   | 0.91954                    | 0.918829                           | 0.444846                   | 0.926681   | 0.926013   | 0.995086  | 0.00331309                 | 0.0623965                  | 0.693939   | 0.412546                   | 0.772232   | 0.792557   |
| 0.952228                   | 0.919486                   | 0.91801                            | 0.995078                   | 0.918531   | 0.918381   | 0.919117  | 0.669796                   | 0.995721                   | 0.0681944  | 0.792609                   | 0.791351   | 0.995211   |
| 0.918257                   | 0.92615                    | 0.788416                           | 0.925982                   | 0.994546   | 0.00362117 |           | 0.919382                   | 0.792937                   | 0.0557703  | 0.0574268                  | 0.995211   | 0.7898     |
| 0.917563                   | 0.923045                   | 0.92615                            | 0.918658                   | 0.918597   | 0.920486   | 0.919221  | 0.0759249                  | 0.793275                   | 0.997653   | 0.99531                    | 0.0690226  | 0.0554942  |
| 0.917493                   | 0.91993                    | 0.92541                            | 0.925844                   | 0.921053   | 0.994986   | 0.918945  | 0.0662617                  | 0.0554942                  | 0.0549344  | AY394850_Riboviria_2981    |            |            |
| 0.925951                   | 0.923151                   | 0.995078                           | 0.0111034                  | 0.931577   | 0.918497   |           | 0.790149                   | 0.995857                   | 0.0342447  | 0.0288594                  | 0.770782   | 0.0359017  |
| 0.918553                   | 0.995078                   | 0.925706                           | 0.791082                   | 0.919244   | 0.92613    |           | 0.0278851                  | 0.995768                   | 0.0396299  | 0.018222                   | 0.921845   | 0.775772   |
| 0.997632                   | 0.994897                   | 0.918447                           | 0.918796                   | 0.918605   | 0.918669   |           | 0.787958                   | 0.995768                   | 0.937862   | 0.0176747                  | 0.38859    | 0.995211   |
| 0.918565                   | KC881006_Coronaviridae_783 |                                    | 0.784946                   | 0.995726   |            |           | 0.0168462                  | 0.0193317                  | 0.0202899  | 0.0186413                  | 0.787269   | 0.881248   |
| 0.390405                   | 0.390405                   | 0.771712                           | 0.392887                   | 0.388337   | 0.995768   | 0.39716   | 0.789524                   | 0.994676                   | 0.920326   | 0.388889                   | 0.789546   | 0.787269   |
| 0.38365                    | 0.917838                   | 0.772326                           | 0.781758                   | 0.995768   | 0.940033   | 0.387372  | 0.0157415                  | 0.03314                    | 0.0618443  | 0.003314                   | 0.687466   | 0.405094   |
| 0.130219                   | 0.995078                   | 0.385856                           | 0.383513                   | 0.38434    | 0.3882     | 0.782171  | 0.768372                   | 0.789524                   | 0.666529   | 0.995857                   | 0.0295498  | 0.789575   |
| 0.879653                   | 0.783184                   | 0.994676                           | 0.919355                   | 0.00303281 | 0.782327   |           | 0.788321                   | 0.995211                   | 0.918117   | 0.790868                   | 0.0216791  | 0.0175318  |
| 0.782171                   | 0.385443                   | 0.390543                           | 0.396057                   | 0.387924   | 0.67686    | 0.0382062 | 0.995211                   | 0.786216                   | 0.878349   | 0.0400331                  | 0.790105   | 0.997653   |
| 0.764819                   | 0.783322                   | 0.655087                           | 0.995864                   | 0.391508   | 0.783016   | 0.780609  | 0.995586                   | 0.0336924                  | 0.0162938  | 0.0283071                  | 0.0156034  | 0.0151829  |
| 0.995211                   | 0.916736                   | 0.789082                           | 0.387372                   | 0.386132   | 0.995211   | 0.781392  | KF569996_Coronaviridae_785 |                            | 0.810882   | 0.995592                   | 0.686364   |            |
| 0.88172                    | 0.395919                   | 0.783765                           | 0.997519                   | 0.995451   | 0.39013    | 0.38558   | 0.686364                   | 0.786226                   | 0.687466   | 0.685399                   | 0.995359   | 0.693113   |
| 0.391646                   | 0.384615                   | 0.384753                           | GQ153543_Coronaviridae_751 |            |            |           | 0.683884                   | 0.919008                   | 0.788981   | 0.800275                   | 0.995359   | 0.940083   |
| 0.795339                   | 0.995449                   | 0.792442                           | 0.792305                   | 0.758516   | 0.793546   | 0.791753  | 0.685813                   | 0.673967                   | 0.995078   | 0.684573                   | 0.683884   | 0.684573   |
| 0.995768                   | 0.79658                    | 0.79065                            | 0.928148                   | 0.740491   | 0.292643   | 0.995632  | 0.686226                   | 0.8                        | 0.890083   | 0.801377                   | 0.994416   | 0.918595   |
| 0.936009                   | 0.791891                   | 0.78283                            | 0.995344                   | 0.791477   | 0.79065    | 0.790925  | 0.801102                   | 0.799449                   | 0.684435   | 0.686226                   | 0.691873   | 0.685399   |
| 0.792442                   | 0.291816                   | 0.804579                           | 0.297037                   | 0.994546   | 0.925252   | 0.784808  | 0.00316804                 | 0.683647                   | 0.78416    | 0.801515                   | 0.584573   | 0.995592   |
| 0.00330989                 | 0.293194                   | 0.791615                           | 0.792305                   | 0.794235   | 0.791339   |           | 0.688705                   | 0.801102                   | 0.79989    | 0.995211                   | 0.916529   | 0.810331   |
| 0.800551                   | 0.791492                   | 0.73473                            | 0.296623                   | 0.798097   | 0.995449   | 0.792442  | 0.684435                   | 0.995078                   | 0.795868   | 0.893802                   | 0.690496   | 0.801791   |
| 0.299641                   | 0.0150117                  | 0.995477                           | 0.923459                   | 0.79258    | 0.792305   | 0.791063  | 0.994766                   | 0.686088                   | 0.684711   | 0.690083                   | 0.683884   | 0.683884   |
| 0.995344                   | 0.292901                   | 0.830782                           | 0.793132                   | 0.297409   | 0.997655   |           | KF367457_Coronaviridae_784 |                            | 0.791492   | 0.995665                   | 0.405636   |            |
| 0.995035                   | 0.791891                   | 0.791477                           | 0.794235                   | 0.790787   | 0.790787   |           | 0.406043                   | 0.778214                   | 0.408075   | 0.404146                   | 0.995665   | 0.411868   |
| GQ153541_Coronaviridae_749 |                            | 0.793745                           | 0.995729                   | 0.788647   |            |           | 0.919523                   | 0.77835                    | 0.787698   | 0.995665                   | 0.9412     | 0.402926   |
| 0.788371                   | 0.756407                   | 0.789887                           | 0.787683                   | 0.995632   | 0.792643   | 0.786718  | 0.995078                   | 0.401436                   | 0.399133   | 0.399946                   | 0.402926   | 0.787969   |
| 0.927528                   | 0.746624                   | 0.0132268                          | 0.995632                   | 0.938551   | 0.788509   |           | 0.789188                   | 0.994286                   | 0.921691   | 0.0364449                  | 0.788917   | 0.788105   |
| 0.782998                   | 0.995211                   | 0.787407                           | 0.786718                   | 0.787131   | 0.788509   | 0.011849  | 0.40103                    | 0.405907                   | 0.411597   | 0.403333                   | 0.683918   | 0.00298063 |
| 0.808212                   | 0.0248002                  | 0.994676                           | 0.926702                   | 0.7841     | 0.29278    | 0.0033067 | 0.771169                   | 0.789324                   | 0.664138   | 0.9958                     | 0.406855   | 0.788917   |
| 0.78782                    | 0.788509                   | 0.791403                           | 0.78906                    | 0.799311   | 0.790001   | 0.73946   | 0.995078                   | 0.919523                   | 0.795285   | 0.402655                   | 0.401707   | 0.995078   |
| 0.0241113                  | 0.798567                   | 0.995729                           | 0.788785                   | 0.0283825  | 0.290456   |           | 0.885381                   | 0.410784                   | 0.78973    | 0.997426                   | 0.995394   | 0.405772   |
| 0.995211                   | 0.925048                   | 0.793056                           | 0.788234                   | 0.787407   | 0.995211   | 0.131992  | 0.406584                   | 0.400217                   | 0.399946   | DQ648857_Riboviria_3101    | 0.771681   |            |
| 0.834665                   | 0.789749                   | 0.0235602                          | 0.997658                   | 0.99504    | 0.788096   | 0.787683  | 0.995588                   | 0.767407                   | 0.767269   | 0.701503                   | 0.769061   | 0.766717   |
| 0.7903                     | 0.787131                   | 0.786994                           | AY357075_Riboviria_2979    | 0.788217   |            |           | 0.772232                   | 0.76589                    | 0.929546   | 0.0621555                  | 0.741113   | 0.995768   |
| 0.995719                   | 0.0245822                  | 0.0196106                          | 0.769093                   | 0.0272062  | 0.0191883  |           | 0.767269                   | 0.760645                   | 0.995211   | 0.767407                   | 0.766441   | 0.76589    |
| 0.995632                   | 0.0312112                  | 0.00980121                         | 0.921143                   | 0.774669   | 0.786856   |           | 0.740011                   | 0.875776                   | 0.74266    | 0.994936                   | 0.925962   | 0.765371   |
| 0.995632                   | 0.937578                   | 0.00745753                         | 0.385697                   | 0.995078   | 0.00842309 |           | 0.741113                   | 0.766441                   | 0.767682   | 0.771681                   | 0.767544   | 0.78416    |
| 0.0103577                  | 0.0117322                  | 0.0104958                          | 0.786167                   | 0.880541   | 0.788422   |           | 0.0031711                  | 0.742522                   | 0.781745   | 0.99545                    | 0.769199   | 0.742314   |
| 0.994676                   | 0.919901                   | 0.385856                           | 0.789546                   | 0.786305   | 0.00317636 |           | 0.995344                   | 0.923894                   | 0.738315   | 0.767682                   | 0.766166   | 0.995211   |
| 0.0236155                  | 0.0541137                  | 0.0154653                          | 0.686639                   | 0.402249   | 0.766855   |           | 0.882256                   | 0.77044                    | 0.743109   | 0.997518                   | 0.994899   | 0.766993   |
| 0.78856                    | 0.663997                   | 0.995581                           | 0.0214029                  | 0.788472   | 0.788321   |           | 0.770578                   | 0.766166                   | 0.766028   | GQ153544_Coronaviridae_752 |            |            |
| 0.995078                   | 0.917415                   | 0.78935                            | 0.0128435                  | 0.0102154  | 0.995078   |           | 0.794211                   | 0.995727                   | 0.790351   | 0.790076                   | 0.759476   | 0.791868   |
| 0.785665                   | 0.877503                   | 0.0318885                          | 0.78914                    | 0.997514   | 0.995448   |           | 0.995632                   | 0.794762                   | 0.788422   | 0.92736                    | 0.748071   | 0.0158446  |
| 0.0238917                  | 0.005386                   | 0.0194724                          | 0.00593759                 | 0.00648723 |            |           | 0.939076                   | 0.790076                   | 0.783933   | 0.995211                   | 0.789111   | 0.788422   |
| EU371563_Riboviria_3207    |                            | 0.789735                           | 0.995701                   | 0.00568576 |            |           | 0.790076                   | 0.0228713                  | 0.808959   | 0.00413508                 | 0.994546   | 0.926533   |
| 0.0117387                  | 0.769796                   | 0.0122036                          | 0.03672                    | 0.995632   | 0.0458385  |           | 0.784562                   | 0.295934                   | 0.0239735  | 0.789387                   | 0.790076   | 0.793108   |
| 0.0280232                  | 0.92137                    | 0.776323                           | 0.788234                   | 0.995632   | 0.937595   |           | 0.790627                   | 0.801377                   | 0.790814   | 0.741006                   | 0.00330806 | 0.799035   |
| 0.0263776                  | 0.392035                   | 0.995078                           | 0.0266501                  | 0.0291396  | 0.0274672  |           | 0.995727                   | 0.790351                   | 0.0220538  | 0.293761                   | 0.995344   | 0.924879   |
| 0.026971                   | 0.787545                   | 0.88056                            | 0.789938                   | 0.994546   | 0.919845   | 0.391646  | 0.793522                   | 0.789938                   | 0.788973   | 0.995211                   | 0.136182   | 0.835975   |
| 0.790925                   | 0.787545                   | 0.0241679                          | 0.00318957                 | 0.0688846  | 0.0330019  |           | 0.0110254                  | 0.997657                   | 0.995038   | 0.7898                     | 0.789387   | 0.792006   |
| 0.688705                   | 0.407804                   | 0.768234                           | 0.7898                     | 0.666066   | 0.995562   | 0.0388014 | 0.788697                   | JX993988_Coronaviridae_779 |            | 0.805464                   | 0.995544   |            |
| 0.789713                   | 0.789561                   | 0.995078                           | 0.917626                   | 0.790868   | 0.0313579  |           | 0.665049                   | 0.666344                   | 0.774489   | 0.664627                   | 0.66317    | 0.995768   |

0.662479 0.924701 0.785557 0.799118 0.995768 0.945976 0.664273 0.930059 0.916563 0.916483 0.995211 0.924052 0.789591 0.917449  
 0.654954 0.994945 0.6628 0.662201 0.663216 0.662102 0.799532 0.924614 0.997779 0.995172 0.916644 0.916724 0.918051 0.916874  
 0.889566 0.800138 0.994676 0.922027 0.655087 0.798373 0.799118 0.916632 DQ412042\_Riboviria\_3073 0.0858049 0.995724 0.79004  
 0.662616 0.664956 0.668415 0.665424 0.584573 0.664273 0.780367 0.789212 0.703407 0.791282 0.788385 0.995495 0.793765 0.787971  
 0.800276 0.00334169 0.995823 0.665148 0.799779 0.797411 0.932956 0.725331 0.794985 0.995495 0.940957 0.789488 0.787378  
 0.994945 0.921999 0.804801 0.663351 0.663584 0.994945 0.798897 0.995344 0.788936 0.788798 0.788109 0.789764 0.794158 0.885226  
 0.893041 0.667725 0.800441 0.997494 0.995034 0.664771 0.66303 0.795038 0.994676 0.932267 0.788668 0.78996 0.794434 0.788936  
 0.66376 0.66211 0.662526 AY646283\_Riboviria\_3003 0.995585 0.789902 0.792247 0.790316 0.812121 0.794879 0.736936 0.795038  
 0.99548 0.995562 0.995581 0.995832 0.995549 0.995721 0.995086 0.803835 0.995448 0.789902 0.796194 0.789561 0.995344 0.930197  
 0.995568 0.995583 0.996388 0.995865 0.995316 0.994949 0.995235 0.00317285 0.789488 0.788247 0.995344 0.795038 0.891157  
 0.995581 0.995728 0.995876 0.995581 0.995581 0.995445 0.995712 0.790316 0.794515 0.997517 0.995172 0.789488 0.789212 0.791971  
 0.995453 0.995982 0.995451 0.995975 0.995543 0.995726 0.995311 0.788247 0.788109 AY278488\_Riboviria\_2951 0.788769 0.995718  
 0.995453 0.995581 0.995424 0.995859 0.995581 0.995179 0.995529 0.0312198 0.0262395 0.768891 0.0337063 0.0165654 0.995632  
 0.995864 0.995451 0.995823 0.00330927 0.995581 0.99545 0.99518 0.0364691 0.00855881 0.920984 0.775772 0.786994 0.995632  
 0.995876 0.995697 0.995448 0.995718 0.995583 0.995876 0.995314 0.93756 0.0146389 0.386937 0.995078 0.0144988 0.0103577  
 0.995833 0.995583 0.995452 0.997593 0.995448 0.995562 0.995581 0.01049 0.0158862 0.786443 0.880232 0.788697 0.994676 0.919602  
 0.99557 0.995581 0.995583 FJ882945\_Coronaviridae\_724 0.790011 0.387235 0.790236 0.786305 0.0128435 0.0306672 0.054942  
 0.995719 0.0401823 0.0346589 0.771334 0.0429439 0.0339591 0.0212648 0.687603 0.403197 0.767958 0.78856 0.664595 0.995718  
 0.995768 0.0249931 0.0245721 0.921845 0.777563 0.788096 0.0272024 0.78861 0.78901 0.995211 0.917116 0.79004 0.00317723  
 0.995632 0.938277 0.0237503 0.391484 0.995078 0.0172604 0.0162893 0.995078 0.786216 0.877331 0.0374103 0.789278  
 0.0243027 0.026225 0.024855 0.787407 0.881386 0.789662 0.997652 0.995448 0.0308054 0.0129816 0.0248653 0.0129798  
 0.994676 0.919635 0.392335 0.790787 0.787407 0.0220933 0.0128364 AY278491\_Riboviria\_2952 0.788079 0.995859  
 0.0390776 0.0681944 0.0296879 0.690771 0.408481 0.769613 0.0294036 0.0237438 0.769464 0.0321645 0.0222253 0.995632  
 0.789662 0.666943 0.995581 0.003314 0.789713 0.789561 0.995078 0.0346494 0.0128382 0.9209 0.774394 0.786443 0.995632 0.937604  
 0.917426 0.790592 0.0277548 0.0251242 0.995078 0.787181 0.012286 0.386661 0.995211 0.0115958 0.0142187 0.0147688  
 0.877934 0.01836 0.790243 0.997514 0.99531 0.0396299 0.0222314 0.0140806 0.785754 0.880453 0.788008 0.994676 0.919658  
 0.0129798 0.0218172 0.0218081 GQ153548\_Coronaviridae\_756 0.386959 0.789133 0.785754 0.0104914 0.0282993 0.0568747  
 0.795505 0.995587 0.790954 0.790816 0.759239 0.792471 0.789989 0.0175318 0.686639 0.403197 0.766579 0.788008 0.664964  
 0.995632 0.795229 0.788886 0.927192 0.747933 0.0210802 0.995583 0.0247101 0.787921 0.788046 0.995211 0.917311  
 0.995632 0.939327 0.790816 0.784071 0.995211 0.789713 0.789024 0.788798 0.0168415 0.00317504 0.995078 0.784976 0.877554  
 0.789437 0.790816 0.0276936 0.80888 0.0234321 0.994676 0.0349255 0.788589 0.997653 0.995448 0.0287134 0.0107675  
 0.926503 0.784946 0.299366 0.028658 0.789989 0.790678 0.793712 0.0230536 0.0102154 0.00979986 EF065512\_Riboviria\_3126  
 0.79123 0.800413 0.791085 0.740797 0.0228808 0.798952 0.995725 0.995876 0.996408 0.99561 0.99561 0.996142 0.995477 0.99561  
 0.790954 0.00330943 0.29748 0.995211 0.92471 0.795091 0.790541 0.979247 0.995344 0.995477 0.996408 0.996009 0.995876 0.979247  
 0.789713 0.995211 0.142385 0.836459 0.792195 0.0227398 0.995743 0.995344 0.995876 0.00518824 0.995477 0.995344  
 0.997656 0.994898 0.790541 0.789851 0.792609 0.789437 0.7893 0.995477 0.995477 0.995743 0.996408 0.996009 0.995715 0.995743  
 GQ153542\_Coronaviridae\_750 0.794794 0.995455 0.7908 0.790525 0.995743 0.995743 0.995876 0.995344 0.995344 0.99561 0.995477  
 0.756645 0.792315 0.790112 0.995768 0.794794 0.78901 0.927834 0.995211 0.99561 0.996009 0.996009 0.99561 0.996408 0.995477  
 0.739017 0.290456 0.995632 0.935822 0.790387 0.780884 0.995211 0.995876 0.99561 0.00558734 0.995743 0.995876 0.995477  
 0.789974 0.789285 0.789285 0.7908 0.289905 0.804297 0.295276 0.995477 0.00305973 0.99561 0.996275 0.995477 0.995876  
 0.994416 0.925217 0.783088 0.0152872 0.29142 0.789974 0.790662 0.997605 0.978848 0.99561 0.995344 0.995477 0.995477 0.995477  
 0.792728 0.789836 0.799339 0.789866 0.733232 0.294725 0.797273 GQ153547\_Coronaviridae\_755 0.794624 0.995589 0.787733  
 0.995455 0.790938 0.298031 0.00316761 0.995344 0.923289 0.787319 0.757409 0.789111 0.786906 0.995495 0.791868 0.785665  
 0.791902 0.790662 0.789561 0.995344 0.291144 0.831428 0.791626 0.926809 0.746692 0.130201 0.995495 0.938249 0.787181 0.781452  
 0.295689 0.997659 0.995042 0.790249 0.789836 0.792728 0.789285 0.995211 0.786354 0.785665 0.786354 0.787319 0.131303 0.81337  
 0.789148 EF065511\_Riboviria\_3125 0.996009 0.996408 0.99561 0.137009 0.994676 0.927223 0.783184 0.294142 0.132268 0.786492  
 0.99561 0.996275 0.995477 0.99561 0.97938 0.995477 0.99561 0.787457 0.790351 0.787457 0.795592 0.789188 0.740041 0.13632  
 0.996541 0.996009 0.995876 0.979247 0.995743 0.995344 0.995876 0.798759 0.995589 0.788146 0.141833 0.291971 0.995211 0.925569  
 0.00744978 0.995477 0.995477 0.995477 0.99561 0.995876 0.793384 0.787457 0.786216 0.995211 0.00317023 0.835837  
 0.996541 0.996009 0.995715 0.995743 0.995743 0.995876 0.788973 0.136852 0.997657 0.995038 0.787181 0.786354 0.789662  
 0.995876 0.995477 0.995477 0.995743 0.995477 0.995211 0.785941 0.785803 MG772934.1\_bat\_SL\_CoVZXC21 0.892936  
 0.995743 0.996142 0.996009 0.995743 0.996408 0.995477 0.995972 0.876976 0.877503 0.882345 0.877622 0.876588  
 0.995876 0.995743 0.00319276 0.995876 0.995876 0.99561 0.995632 0.877579 0.876449 0.793721 0.881753 0.833287  
 0.995477 0.00558734 0.995743 0.996408 0.995477 0.996009 0.995632 0.94527 0.877503 0.880529 0.995344 0.876553 0.87626  
 0.997738 0.978981 0.99561 0.995477 0.995477 0.995477 0.995477 0.877019 0.876902 0.83315 0.308716 0.834459 0.994676 0.792054  
 MN908947.3\_alt.\_SARS\_CoV\_2 0.93074 0.99542 0.916921 0.880755 0.829954 0.833012 0.876674 0.876855 0.878796 0.877382  
 0.917139 0.925885 0.917418 0.916621 0.995086 0.919125 0.893113 0.88362 0.879912 0.834459 0.890818 0.995555 0.87683  
 0.916759 0.442193 0.925028 0.924359 0.995086 0.951006 0.834528 0.830326 0.995477 0.790423 0.89033 0.876364 0.876726  
 0.917415 0.915805 0.995211 0.916736 0.91631 0.917184 0.995477 0.835286 0.00361161 0.877278 0.834206 0.997639  
 0.917704 0.924497 0.786061 0.924328 0.994806 0.011381 0.994759 0.876699 0.876813 0.877215 0.876415 0.876605  
 0.915357 0.921528 0.924635 0.916724 0.916794 0.918829 FJ882942\_Coronaviridae\_723 0.790701 0.995721 0.0505246  
 0.917288 0.915702 0.918304 0.923894 0.924466 0.921721 0.0451408 0.771811 0.0530094 0.0437604 0.995768 0.033545  
 0.995281 0.91715 0.924297 0.921636 0.995211 0.00388619 0.0349255 0.922004 0.778666 0.789474 0.995632 0.938984

|                            |                             |                            |                         |            |            |                                                          |             |            |                           |             |            |
|----------------------------|-----------------------------|----------------------------|-------------------------|------------|------------|----------------------------------------------------------|-------------|------------|---------------------------|-------------|------------|
| 0.0342352                  | 0.39548                     | 0.995078                   | 0.0281612               | 0.0349255  | 0.0365769  | 0.99557                                                  | 0.0133941   | 0.79123    | 0.791351                  | 0.995211    | 0.918605   |
| 0.0353396                  | 0.788647                    | 0.881833                   | 0.791041                | 0.994546   | 0.92021    | 0.792937                                                 | 0.0256942   | 0.0237438  | 0.995078                  | 0.788835    | 0.878599   |
| 0.791615                   | 0.788647                    | 0.0327167                  | 0.0494202               | 0.0757869  | 0.0401712  | 0.024434                                                 | 0.791759    | 0.997508   | 0.995448                  | 0.0359911   | 0.0207154  |
| 0.693113                   | 0.412139                    | 0.771129                   | 0.791041                | 0.669658   | 0.995583   | 0.00332226                                               | 0.0208506   | 0.0205659  | EU371559_Riboviria_3203   |             |            |
| 0.0184981                  | 0.791092                    | 0.790387                   | 0.995078                | 0.918001   | 0.791006   | 0.787804                                                 | 0.995719    | 0.0240265  | 0.0185032                 | 0.768848    | 0.0266501  |
| 0.0383766                  | 0.0354776                   | 0.995078                   | 0.788284                | 0.878796   | 0.00317504 | 0.0197405                                                | 0.995632    | 0.0316211  | 0.00980121                | 0.921292    | 0.774531   |
| 0.791621                   | 0.997377                    | 0.99531                    | 0.0498343               | 0.0328548  | 0.024296   | 0.786167                                                 | 0.995632    | 0.937862   | 0.008285                  | 0.384732    | 0.995078   |
| 0.0325787                  | 0.0318841                   | GQ153546_Coronaviridae_754 |                         | 0.793688   |            | 0.008285                                                 | 0.0110467   | 0.0118703  | 0.0106324                 | 0.785616    | 0.88042    |
| 0.995728                   | 0.790932                    | 0.790656                   | 0.759647                | 0.792448   | 0.789967   | 0.78787                                                  | 0.994546    | 0.919912   | 0.385167                  | 0.788857    | 0.785616   |
| 0.795342                   | 0.788864                    | 0.927233                   | 0.748208                | 0.015569   | 0.995632   | 0.00635184                                               | 0.0229218   | 0.0550801  | 0.0151892                 | 0.685813    | 0.401707   |
| 0.790656                   | 0.784622                    | 0.995211                   | 0.789691                | 0.789002   | 0.789416   | 0.766579                                                 | 0.78787     | 0.663629   | 0.995719                  | 0.021541    | 0.787921   |
| 0.022458                   | 0.808848                    | 0.0118523                  | 0.994676                | 0.926681   | 0.785143   | 0.787633                                                 | 0.995211    | 0.917564   | 0.788661                  | 0.0135322   | 0.0103534  |
| 0.296996                   | 0.0235602                   | 0.789967                   | 0.790794                | 0.793688   | 0.791207   | 0.995078                                                 | 0.784976    | 0.877382   | 0.0320265                 | 0.788589    | 0.997514   |
| 0.801515                   | 0.791356                    | 0.741455                   | 0.011301                | 0.799201   | 0.995728   | 0.995448                                                 | 0.0233361   | 0.006628   | 0.019884                  | 0.003314    | 0.00676329 |
| 0.0219129                  | 0.294725                    | 0.995344                   | 0.925028                | 0.792861   | 0.790518   | NC_004718_Coronaviridae_806                              |             | 0.787528   | 0.995859                  | 0.0258109   |            |
| 0.789553                   | 0.995344                    | 0.137128                   | 0.835584                | 0.792172   | 0.00330761 | 0.0204279                                                | 0.768806    | 0.0285714  | 0.0190476                 | 0.995632    | 0.03147    |
| 0.997657                   | 0.995039                    | 0.79038                    | 0.789967                | 0.792585   | 0.789416   | 0.0089717                                                | 0.921049    | 0.774118   | 0.786029                  | 0.995632    | 0.937474   |
| humanMito                  | 0.998482                    | 0.998729                   | 0.998197                | 0.998205   | 0.998333   | 0.00869565                                               | 0.385008    | 0.995078   | 0.00814355                | 0.01049     | 0.0109041  |
| 0.998053                   | 0.998067                    | 0.998771                   | 0.998061                | 0.998205   | 0.999028   | 0.0102139                                                | 0.78534     | 0.880331   | 0.787595                  | 0.994676    | 0.919531   |
| 0.998484                   | 0.998347                    | 0.998635                   | 0.998178                | 0.997928   | 0.998071   | 0.788857                                                 | 0.785478    | 0.00690131 | 0.0249827                 | 0.0545204   | 0.0151829  |
| 0.998067                   | 0.998067                    | 0.998068                   | 0.998064                | 0.998209   | 0.998753   | 0.68595                                                  | 0.401436    | 0.766441   | 0.787733                  | 0.664044    | 0.995721   |
| 0.998182                   | 0.998189                    | 0.998208                   | 0.998345                | 0.998209   | 0.997928   | 0.787645                                                 | 0.787633    | 0.995078   | 0.917184                  | 0.788523    | 0.0131125  |
| 0.998343                   | 0.998067                    | 0.997934                   | 0.998103                | 0.998346   | 0.998346   | 0.00952381                                               | 0.995078    | 0.784838   | 0.877295                  | 0.03147     | 0.788313   |
| 0.998646                   | 0.998067                    | 0.998345                   | 0.99821                 | 0.998271   | 0.998334   | 0.997516                                                 | 0.995448    | 0.0252588  | 0.00703934                | 0.0197378   | 0.00676329 |
| 0.998066                   | 0.998067                    | 0.998138                   | 0.998346                | 0.99875    | 0.998067   | 0.0031746                                                |             |            |                           |             |            |
| 0.00602107                 | 0.998069                    | 0.998058                   | 0.998067                | 0.998062   | 0.998067   | IV. NCD DISTANCE MATRIX UNDERLYING FIGURE 2 IN THE       |             |            |                           |             |            |
| 0.998068                   | NC_034440_Coronaviridae_847 |                            | 0.994897                | 0.995448   |            | MAIN BODY OF THE PAPER                                   |             |            |                           |             |            |
| 0.995448                   | 0.995448                    | 0.995172                   | 0.995172                | 0.99531    | 0.978569   | EPI_ISL_402132_19_Wuhan_HBCDC-HB-01_2019                 |             | 0.00375156 |                           |             |            |
| 0.99531                    | 0.995724                    | 0.99559                    | 0.995178                | 0.978569   | 0.99531    | 0.0115326                                                | 0.442623    | 0.0393219  | 0.00763253                | 0.00569049  |            |
| 0.995177                   | 0.977784                    | 0.995172                   | 0.995172                | 0.995172   | 0.99531    | 0.43407                                                  | 0.0106989   | 0.786061   | 0.0108378                 | 0.00500208  | 0.736279   |
| 0.995172                   | 0.995176                    | 0.995455                   | 0.995034                | 0.995175   | 0.995035   | 0.00430735                                               | 0.00693963  | 1.5134e-08 | 0.872725                  | 0.87203     | 0.00624566 |
| 0.995034                   | 0.995172                    | 0.995172                   | 0.99531                 | 0.994766   | 0.995258   | 0.00652325                                               | 0.0113936   | 0.0111157  | 0.00569049                | 0.00639066  |            |
| 0.995314                   | 0.994897                    | 0.995586                   | 0.99531                 | 0.995174   | 0.994904   | 0.01056                                                  | 0.00625174  | 0.00569049 | 0.00680745                | 0.00693963  |            |
| 0.995172                   | 0.994759                    | 0.99531                    | 0.99531                 | 0.977917   | 0.995038   | 0.789415                                                 | 0.997638    | 0.0113936  | 0.0113936                 | 0.00680839  | 0.0113936  |
| 0.995172                   | 0.995176                    | 0.997379                   | 0.00331034              | 0.995448   | 0.995172   | 0.0113936                                                | 0.0112547   | 0.00486246 | EPI_ISL_421342_19_USA_WI- |             |            |
| 0.995172                   | 0.995172                    | 0.995172                   | EU371561_Riboviria_3205 | 0.789183   |            | UW-83_2020                                               | 0.0111157   | 0.00376097 | 0.445402                  | 0.0417885   |            |
| 0.9957                     | 0.0073509                   | 0.00925287                 | 0.769209                | 0.0137309  | 0.0368581  | 0.0137386                                                | 0.0117974   | 0.435715   | 0.0044562                 | 0.788139    | 0.00431755 |
| 0.995768                   | 0.046254                    | 0.0282993                  | 0.921082                | 0.775634   | 0.78782    | 0.0113936                                                | 0.738453    | 0.01056    | 0.0129077                 | 2.14204e-08 | 0.873749   |
| 0.937725                   | 0.0267919                   | 0.391622                   | 0.995211                | 0.0272024  | 0.0292777  | 0.873089                                                 | 0.0122137   | 0.0126301  | 0.00487465                | 0.00445745  |            |
| 0.0276052                  | 0.0273859                   | 0.787131                   | 0.880421                | 0.789249   | 0.994676   | 0.0117974                                                | 0.0123645   | 0.00501253 | 0.0123645                 | 0.0117974   |            |
| 0.919834                   | 0.391232                    | 0.790512                   | 0.787131                | 0.0245822  | 0.00624047 | 0.0123645                                                | 0.0130465   | 0.790943   | 0.997632                  | 0.00487465  | 0.00487465 |
| 0.0690226                  | 0.0336924                   | 0.68843                    | 0.407668                | 0.767407   | 0.789387   | 0.0112656                                                | 0.00487465  | 0.00487465 | 0.00487465                | 0.0108363   | Beta-      |
| 0.665881                   | 0.9957                      | 0.0394919                  | 0.7893                  | 0.789285   | 0.995211   | CoV_bat_Yunnan_RaTG13_2013—EPI_ISL_402131_EPI_ISL_402131 |             | 0.441234   | 0.444429                  | 0.00361211  | 0.461795   |
| 0.790316                   | 0.0314961                   | 0.0289895                  | 0.995078                | 0.786492   | 0.877254   | 0.441234                                                 | 0.444429    | 0.00361211 | 0.461795                  | 0.441715    | 0.441083   |
| 0.0495583                  | 0.789967                    | 0.997503                   | 0.995448                | 0.00332871 | 0.0254109  | 0.486385                                                 | 0.443873    | 0.793543   | 0.443873                  | 0.44165     | 0.737983   |
| 0.0358527                  | 0.0237503                   | 0.0256729                  | AY350750_Riboviria_2977 |            |            | 0.441915                                                 | 7.40867e-07 | 0.87955    | 0.878161                  | 0.44136     | 0.441499   |
| 0.788493                   | 0.995857                    | 0.0254109                  | 0.0198868               | 0.769093   | 0.0280348  | 0.444012                                                 | 0.444151    | 0.441083   | 0.441373                  | 0.444012    | 0.441928   |
| 0.0194644                  | 0.995632                    | 0.0316255                  | 0.00993926              | 0.921282   | 0.774669   | 0.441083                                                 | 0.441512    | 0.442193   | 0.793027                  | 0.997638    | 0.444012   |
| 0.78658                    | 0.995632                    | 0.937578                   | 0.00773374              | 0.385834   | 0.995211   | 0.443457                                                 | 0.442484    | 0.444429   | 0.444012                  | 0.443457    | 0.441095   |
| 0.00869925                 | 0.0106339                   | 0.0118703                  | 0.0104958               | 0.785891   | 0.880679   | EPI_ISL_412900_19_Wuhan_HBCDC-HB-04_2019                 |             | 0.0401556  |                           |             |            |
| 0.788146                   | 0.994676                    | 0.920039                   | 0.385994                | 0.78927    | 0.785891   | 0.0427636                                                | 0.463323    | 0.00383632 | 0.043436                  | 0.041499    | 0.453936   |
| 0.024306                   | 0.0550801                   | 0.0157415                  | 0.686639                | 0.40252    | 0.766855   | 0.0423339                                                | 0.797561    | 0.0422006  | 0.0393219                 | 0.750556    | 0.0400167  |
| 0.788284                   | 0.664411                    | 0.995719                   | 0.0216791               | 0.788058   | 0.788046   | 0.0426093                                                | 7.24103e-08 | 0.878615   | 0.877954                  | 0.041499    | 0.0406662  |
| 0.995211                   | 0.917553                    | 0.789488                   | 0.0129816               | 0.0103534  | 0.995211   | 0.0422006                                                | 0.0422123   | 0.041499   | 0.0418172                 | 0.0420496   | 0.0419561  |
| 0.785527                   | 0.877641                    | 0.0323026                  | 0.788864                | 0.997514   | 0.995448   | 0.041499                                                 | 0.0414004   | 0.041499   | 0.801639                  | 0.997442    | 0.0427577  |
| 0.0247203                  | 0.00317636                  | 0.0197487                  | 0.00607567              | 0.00676329 |            | 0.0427577                                                | 0.0392211   | 0.0427577  | 0.0427577                 | 0.0426184   | 0.0405668  |
| FJ882935_Coronaviridae_722 |                             | 0.792219                   | 0.995709                | 0.0366833  |            | EPI_ISL_402123_19_Wuhan_IPBCAMS-WH-01_2019               |             | 0.0077713  |                           |             |            |
| 0.0335589                  | 0.77021                     | 0.039175                   | 0.0321645               | 0.995768   | 0.0185493  | 0.0141549                                                | 0.442687    | 0.0424646  | 0.00374688                | 0.00610602  | 0.435332   |
| 0.0234677                  | 0.922619                    | 0.779768                   | 0.789611                | 0.995768   | 0.939092   | 0.013461                                                 | 0.786338    | 0.013461   | 0.00791007                | 0.735776    | 0.00707744 |
| 0.0222345                  | 0.392449                    | 0.995211                   | 0.0160177               | 0.0227869  | 0.0252588  | 0.00721621                                               | 1.76951e-08 | 0.873161   | 0.872329                  | 0.00666112  | 0.00679989 |
| 0.0208852                  | 0.788923                    | 0.881783                   | 0.791178                | 0.994676   | 0.919712   | 0.0138773                                                | 0.0137386   | 0.0062448  | 0.00832639                | 0.0131835   | 0.00832639 |
| 0.392749                   | 0.79258                     | 0.788923                   | 0.0204392               | 0.0355759  | 0.0663998  | 0.00610602                                               | 0.00846517  | 0.00735498 | 0.789759                  | 0.997641    | 0.0141549  |
| 0.0288594                  | 0.692287                    | 0.408481                   | 0.771543                | 0.791178   | 0.665144   |                                                          |             |            |                           |             |            |

|                                                                |                                                                |
|----------------------------------------------------------------|----------------------------------------------------------------|
| 0.0141549 0.00957535 0.0141549 0.0141549 0.0138773 0.00693866  | 0.00721721 0.00610687 0.789035 0.997641 0.0130465 0.0129077    |
| EPI_ISL_403929_19_Wuhan_IPBCAMS-WH-04_2019 0.00541291          | 0.00832755 0.0127689 0.0129077 0.0127689 0.00569049            |
| 0.0117974 0.442193 0.0403886 0.00596725 0.0037474 0.434559     | EPI_ISL_417385_19_Australia_NSW19_2020 1.53668e-08             |
| 0.0111034 0.785922 0.0112422 0.0055517 0.735878 0.00471895     | 2.23517e-08 7.42963e-07 7.1479e-08 1.74623e-08 1.46683e-08     |
| 0.00499653 1.42027e-08 0.873005 0.872311 0.00444136 0.00458015 | 7.28061e-07 2.11876e-08 1.31759e-06 2.11876e-08 1.58325e-08    |
| 0.0117974 0.0115198 0.00388619 0.00624566 0.0109646            | 1.23563e-06 1.44355e-08 1.6531e-08 -0.999998 1.46171e-06       |
| 0.00596808 0.0037474 0.00610687 0.00513532 0.789591 0.997779   | 1.46055e-06 1.55997e-08 1.58325e-08 2.18861e-08 2.16532e-08    |
| 0.0119362 0.0119362 0.00721721 0.0117974 0.0117974 0.0116586   | 1.46683e-08 1.69966e-08 2.16532e-08 1.72295e-08 1.46683e-08    |
| 0.00458015 EPI_ISL_412977_19_bat_Yunnan_RmYN02_2019            | 1.72295e-08 1.6531e-08 1.32364e-06 1.66777e-06 2.21189e-08     |
| 0.433097 0.435158 0.486663 0.452401 0.434638 0.433865          | 2.21189e-08 1.72295e-08 2.21189e-08 2.18861e-08 2.18861e-08    |
| 0.00348967 0.434619 0.793266 0.43468 0.433375 0.752226         | 1.44355e-08 EPI_ISL_410539_19_pangolin_Guangxi_PIE_2017        |
| 0.433236 0.434698 7.27363e-07 0.882369 0.881151 0.434282       | 0.871474 0.872497 0.878161 0.877364 0.871635 0.871339          |
| 0.434004 0.434819 0.434801 0.433865 0.434148 0.434976          | 0.88223 0.872497 0.898711 0.872497 0.871335 0.863042           |
| 0.433732 0.433865 0.434287 0.435115 0.79136 0.997627           | 0.871335 0.871339 1.45962e-06 0.00375417 0.0145955 0.871478    |
| 0.435097 0.434262 0.433658 0.435237 0.434958 0.434958          | 0.871478 0.872497 0.872775 0.871478 0.871353 0.872219          |
| 0.433315 EPI_ISL_461437_19_USA_UNKNOWN-UW-5620_2020            | 0.87177 0.871339 0.871631 0.871617 0.898875 0.997497           |
| 0.010421 0.0044562 0.444846 0.0413591 0.0129059 0.0109646      | 0.872497 0.872775 0.871802 0.872636 0.872497 0.872775          |
| 0.435037 0.00362067 0.788278 0.00375992 0.01056 0.738314       | 0.871492 EPI_ISL_410540_19_pangolin_Guangxi_P5L_2017           |
| 0.00972627 0.0120749 2.04891e-08 0.873749 0.873089 0.0115198   | 0.870502 0.871699 0.876493 0.876564 0.870525 0.870645          |
| 0.0116586 0.00431695 0.00403843 0.0109646 0.011531 0.00431635  | 0.880873 0.87156 0.899543 0.871699 0.870502 0.861134           |
| 0.011531 0.0109646 0.011531 0.0122137 0.791082 0.997633        | 0.870502 0.870507 1.45822e-06 0.0147345 0.00361412 0.870645    |
| 0.00431695 0.0044562 0.0105702 0.00431695 0.00431695           | 0.870507 0.871699 0.871977 0.870645 0.87052 0.871421 0.870936  |
| 0.00417769 0.0101417 MG772933.1_bat_SL_CoVZC45 0.783844        | 0.870645 0.870659 0.870784 0.899014 0.997637 0.871699          |
| 0.785645 0.79285 0.795206 0.783844 0.783567 0.793404           | 0.871838 0.871004 0.871838 0.871699 0.871977 0.870659          |
| 0.785784 0.00374117 0.785922 0.783844 0.831509 0.783705        | EPI_ISL_403930_19_Wuhan_IPBCAMS-WH-03_2019 0.00610687          |
| 0.782874 1.3134e-06 0.897049 0.898296 0.783705 0.783567        | 0.0124913 0.442609 0.0405274 0.00638357 0.00444136 0.434976    |
| 0.785922 0.786199 0.783567 0.783705 0.785645 0.784675          | 0.0117974 0.786061 0.0117974 0.00624566 0.736017 0.00541291    |
| 0.783567 0.784121 0.784121 0.306499 0.997506 0.785922          | 0.00569049 1.5134e-08 0.873282 0.872588 0.0037474 0.00527412   |
| 0.786338 0.784398 0.786061 0.785922 0.786061 0.783844          | 0.0123525 0.0120749 0.00458015 0.00680083 0.0115198            |
| selected_SARS_CoV_2_EPI_ISL_471246 0.010421 0.00417827         | 0.00666204 0.00444136 0.00680083 0.00569049 0.789729 0.997779  |
| 0.444846 0.0412256 0.0130447 0.0111034 0.435097 0.00375992     | 0.0124913 0.0123525 0.00791117 0.0123525 0.0123525 0.0122137   |
| 0.788416 0.00362117 0.0106989 0.738314 0.00986522 0.0122137    | 0.00527412 EPI_ISL_434534_19_Wuhan_IVDC-HB-GX02_2019           |
| 2.04891e-08 0.873888 0.873228 0.0115198 0.0117974 0.004039     | 0.00624566 0.0127689 0.442609 0.0396947 0.00679989 0.00458015  |
| 0.00389972 0.0111034 0.0116699 0.00417711 0.0116699            | 0.434698 0.0120749 0.786061 0.0120749 0.00485774 0.735878      |
| 0.0111034 0.0116699 0.0123525 0.791082 0.997632 0.00417827     | 0.00569049 0.00582929 1.53668e-08 0.873005 0.872311 0.00527412 |
| 0.00417827 0.0105702 0.00417827 0.00417827 0.004039 0.0101417  | 0.0037474 0.0124913 0.0123525 0.00471895 0.00707842            |
| EPI_ISL_412898_19_Wuhan_HBCDC-HB-02_2019 0.00514103            | 0.0117974 0.00693963 0.00458015 0.00707842 0.00596808          |
| 0.0116715 0.442901 0.0386272 0.0077713 0.00596808 0.43407      | 0.789452 0.997779 0.0127689 0.0127689 0.00652325 0.0126301     |
| 0.0109768 0.786061 0.0109768 0.00361262 0.736279 0.00458524    | 0.0126301 0.0124913 0.0055517 EPI_ISL_471189_19_USA_WI-        |
| 0.00707842 1.55997e-08 0.872725 0.87203 0.00652325 0.00499653  | WSLH-200024_2020 0.0111157 0.00487465 0.444985 0.0412256       |
| 0.0115326 0.0112547 0.00596808 0.00652959 0.0106989            | 0.0135998 0.0116586 0.435237 0.00431695 0.788416 0.00417827    |
| 0.00652959 0.00596808 0.0070853 0.00721721 0.789276 0.997638   | 0.0112547 0.738314 0.01056 0.0127689 2.14204e-08 0.873888      |
| 0.0116715 0.0116715 0.00527998 0.0116715 0.0116715 0.0115326   | 0.873228 0.0122137 0.0124913 0.00362117 0.00445682             |
| 0.00514032 EPI_ISL_410721_19_pangolin_Guangdong_1_2019         | 0.0116586 0.0122256 0.00487329 0.0122256 0.0116586             |
| 0.736418 0.73887 0.736871 0.750556 0.736192 0.736017           | 0.0122256 0.0129077 0.791221 0.997493 0.00487465 0.00473538    |
| 0.752087 0.738453 0.83331 0.738592 0.736418 0.00375626         | 0.0112656 0.00473538 0.00473538 0.0045961 0.0106974            |
| 0.736418 0.7356 1.23633e-06 0.860261 0.858771 0.736017         | EPI_ISL_422680_19_Netherlands_NA_136_2020 0.0108378            |
| 0.736017 0.738731 0.73887 0.736017 0.736593 0.738314           | 0.00473604 0.445263 0.0412371 0.013461 0.011381 0.435358       |
| 0.736732 0.736017 0.737427 0.737266 0.833866 0.997774          | 0.00431695 0.788555 0.00417827 0.0111157 0.738731 0.0102821    |
| 0.738592 0.739009 0.736996 0.73887 0.739009 0.738731 0.736316  | 0.0126301 2.14204e-08 0.873888 0.873228 0.0119362 0.0122137    |
| EPI_ISL_412899_19_Wuhan_HBCDC-HB-03_2019 0.00430735            | 0.00473538 0.00362218 0.011381 0.0119478 0.00459482 0.0120867  |
| 0.0108378 0.442484 0.0394609 0.00707744 0.00513532 0.433931    | 0.011381 0.0120867 0.0126301 0.79136 0.997492 0.00487465       |
| 0.0101431 0.786061 0.0101431 0.0044463 0.736279 0.00361262     | 0.00487465 0.0109875 0.00473538 0.00473538 0.00473538          |
| 0.00624566 1.42027e-08 0.872725 0.87203 0.00569049 0.00582929  | 0.0105585 MN908947.3_alt_SARS_CoV_2 0.00541291 0.0119362       |
| 0.0108378 0.010421 0.00513532 0.00569603 0.00986522            | 0.442193 0.0405274 0.00582848 0.00388619 0.434559 0.011381     |
| 0.00569603 0.00513532 0.00611281 0.00638446 0.789415           | 0.786061 0.011381 0.0055517 0.735878 0.00485774 0.00499653     |
| 0.997638 0.0108378 0.0108378 0.00611366 0.0108378 0.0108378    | 1.42027e-08 0.873144 0.872311 0.00444136 0.00458015            |
| 0.0106989 0.00430675 EPI_ISL_402121_19_Wuhan_IVDC-             | 0.0117974 0.0116586 0.00388619 0.00624566 0.0109646            |
| HB-05_2019 0.00652325 0.0130465 0.442887 0.0416378             | 0.00610687 0.00388619 0.00624566 0.00513532 0.789591           |
| 0.00693866 0.00485774 0.435392 0.0123525 0.785229 0.0122137    | 0.997779 0.0119362 0.0119362 0.007356 0.0119362 0.0119362      |
| 0.00666204 0.7356 0.00582929 0.00360861 1.58325e-08            | 0.0117974 0.00471895 EPI_ISL_402128_19_Wuhan_WIV05_2019        |
| 0.872866 0.872172 0.0055517 0.00569049 0.0129077 0.0124913     | 0.00597388 0.0125035 0.442484 0.0407058 0.00818762 0.00624566  |
| 0.00499653 0.00721721 0.0120749 0.00707842 0.00485774          | 0.434982 0.0116699 0.786199 0.0118088 0.00611281 0.736177      |



0.00527924 0.0074948 1.67638e-08 0.872881 0.872326 0.00680083  
0.00707842 0.0122256 0.0120867 0.00624566 0.00361211 0.011531  
0.00694637 0.00624566 0.00736316 0.00763359 0.789415 0.997638  
0.0123645 0.0123645 0.00777994 0.0123645 0.0123645 0.0122256  
0.00541817 EPI\_ISL\_421370\_19\_USA\_NY-PV08402\_2020  
0.0100042 0.00459482 0.444846 0.0409357 0.0126284 0.0105482  
0.435394 0.00403787 0.788001 0.00403787 0.0102821 0.738036  
0.00944838 0.0117974 2.07219e-08 0.873471 0.872811 0.0111034  
0.011381 0.00445558 0.00431635 0.0105482 0.0112531 0.00362016  
0.0113921 0.0105482 0.0112531 0.0117974 0.790804 0.997633  
0.00459482 0.00459482 0.0102921 0.00459482 0.00459482  
0.00445558 0.00986385 EPI\_ISL\_402130\_19\_Wuhan\_WIV07\_2019  
0.00597388 0.0125035 0.443179 0.0409836 0.00804885 0.00582929  
0.434287 0.0116699 0.786892 0.0118088 0.00625174 0.736316  
0.00527924 0.00721721 1.67638e-08 0.873159 0.872465 0.00666204  
0.00680083 0.0123645 0.0120867 0.00582929 0.00680745 0.011531  
0.00361211 0.00582929 0.00722423 0.007356 0.790249 0.997777  
0.0125035 0.0125035 0.00777994 0.0125035 0.0123645 0.0123645  
0.00527924 EPI\_ISL\_402119\_19\_Wuhan\_IVDC-HB-01\_2019  
0.00527412 0.0119362 0.442193 0.0403886 0.00596725 0.0037474  
0.434559 0.0112422 0.786061 0.0112422 0.0055517 0.735878  
0.00471895 0.00499653 1.42027e-08 0.873005 0.872311 0.00444136  
0.00458015 0.0117974 0.0115198 0.00388619 0.00624566  
0.0109646 0.00610687 0.0037474 0.00610687 0.00499653 0.789452  
0.997641 0.0119362 0.0119362 0.00721721 0.0117974 0.0117974  
0.0116586 0.00458015 EPI\_ISL\_406798\_19\_Wuhan\_WH01\_2019  
0.00652959 0.0123645 0.442206 0.04015 0.00832639 0.00610687  
0.434982 0.0116699 0.786338 0.0116699 0.00666852 0.736732  
0.00583495 0.00721721 1.6531e-08 0.872881 0.872187 0.00680083  
0.00680083 0.0122256 0.0119478 0.00624566 0.00722423  
0.0113921 0.0070853 0.00610687 0.00375104 0.007356 0.789693  
0.997638 0.0123645 0.0122256 0.00764101 0.0122256 0.0122256  
0.0120867 0.00569603 EPI\_ISL\_403931\_19\_Wuhan\_IPBCAMS-  
WH-02\_2019 0.00666204 0.0131853 0.443303 0.0403886  
0.00721621 0.00513532 0.43567 0.0124913 0.786476 0.0124913  
0.00693963 0.736849 0.00610687 0.00652325 1.62981e-  
08 0.873282 0.872588 0.00582929 0.00596808 0.0130465  
0.0127689 0.00527412 0.0074948 0.0122137 0.007356 0.00527412  
0.0074948 0.0037474 0.790007 0.997641 0.0131853 0.0130465  
0.00860514 0.0130465 0.0130465 0.0130465 0.00582929  
MG772934.1\_bat\_SL\_CoVZXC21 0.790388 0.791916 0.793721  
0.801639 0.790591 0.790423 0.793444 0.792054 0.308716 0.792054  
0.790249 0.833588 0.790388 0.790007 1.32504e-06 0.898041  
0.898319 0.790562 0.790423 0.792054 0.792332 0.790423 0.790249  
0.791777 0.79136 0.790423 0.790804 0.790978 0.00361161  
0.997639 0.792193 0.792471 0.791082 0.792332 0.792054  
0.792471 0.790388 humanMito 0.998194 0.998328 0.999028  
0.998011 0.998335 0.998334 0.998465 0.99819 0.998753 0.998189  
0.998194 0.999026 0.998194 0.998196 1.66893e-06 0.998888  
0.998888 0.998473 0.998334 0.998189 0.998189 0.998334  
0.998194 0.998329 0.998194 0.998334 0.998472 0.998334  
0.99875 0.00602107 0.998189 0.998189 0.99847 0.998329  
0.998189 0.998189 0.998194 EPI\_ISL\_420376\_19\_Belgium\_CF-  
0324119\_2020 0.0112547 0.00501393 0.444846 0.041922  
0.0137386 0.0117974 0.435515 0.0044562 0.788693 0.00431755  
0.0115326 0.738314 0.0106989 0.0129077 2.16532e-08  
0.874027 0.873228 0.0123525 0.0126301 0.00487465 0.0045961  
0.0117974 0.0123645 0.00501253 0.0125035 0.0117974  
0.0123645 0.0130465 0.79136 0.997493 0.00362117 0.00501393  
0.0114047 0.00501393 0.00501393 0.00487465 0.0109753  
EPI\_ISL\_437037\_19\_Denmark\_ALAB-SSI-679\_2020 0.0111157  
0.00487465 0.444429 0.0416435 0.0135998 0.0116586 0.43468  
0.00431695 0.788832 0.00417827 0.0112547 0.738731 0.010421

0.0127689 2.14204e-08 0.874027 0.873367 0.0122137 0.0123525  
0.00473538 0.00445682 0.0116586 0.0122256 0.00487329  
0.0122256 0.0116586 0.0122256 0.0129077 0.791499 0.997632  
0.00487465 0.00362117 0.0111266 0.00473538 0.00473538  
0.00473538 0.0106974 EPI\_ISL\_402127\_19\_Wuhan\_WIV02\_2019  
0.00680839 0.0115438 0.443595 0.0386648 0.00929781 0.007356  
0.434214 0.0105702 0.786476 0.0108484 0.00541892 0.736718  
0.00625261 0.00846634 1.67638e-08 0.872914 0.872255  
0.00791117 0.00638446 0.0114047 0.0111266 0.007356 0.00791887  
0.0105702 0.00805779 0.007356 0.00805779 0.00860514 0.789971  
0.997636 0.0114047 0.0114047 0.00361613 0.0114047 0.0114047  
0.0112656 0.00652959 EPI\_ISL\_467889\_19\_USA\_NY-QDX-  
136\_2020 0.0111157 0.00487465 0.445402 0.0417827 0.0135998  
0.0116586 0.435655 0.00431695 0.788555 0.00417827 0.0112547  
0.738592 0.010421 0.0127689 2.14204e-08 0.873888 0.873228  
0.0122137 0.0123525 0.00473538 0.00445682 0.0116586  
0.0122256 0.00473406 0.0122256 0.0116586 0.0122256 0.0129077  
0.79136 0.997632 0.00473538 0.00473538 0.0112656 0.00362117  
0.00473538 0.0045961 0.0106974 EPI\_ISL\_484714\_19\_USA\_MI-  
UM-2006S000857\_2020 0.0111157 0.00487465 0.444985  
0.0417827 0.0135998 0.0116586 0.435515 0.00431695 0.788416  
0.00417827 0.0112547 0.738592 0.01056 0.0127689 2.14204e-  
08 0.873888 0.873089 0.0122137 0.0124913 0.00473538  
0.00445682 0.0116586 0.0122256 0.00473406 0.0122256  
0.0116586 0.0122256 0.0127689 0.791082 0.997493 0.00473538  
0.00473538 0.0112656 0.00473538 0.00362117 0.0045961  
0.0106974 EPI\_ISL\_487453\_19\_Mali\_M002667\_2020 0.0109768  
0.00473538 0.444568 0.0416435 0.013461 0.0115198 0.435515  
0.00417769 0.788416 0.004039 0.0111157 0.738314 0.0102821  
0.0126301 2.11876e-08 0.874027 0.873367 0.0120749 0.0123525  
0.0045961 0.00431755 0.0115198 0.0119478 0.00473406 0.0120867  
0.0115198 0.0120867 0.0127689 0.791499 0.997493 0.00473538  
0.00473538 0.0111266 0.0045961 0.0045961 0.00348189 0.0105585  
EPI\_ISL\_402129\_19\_Wuhan\_WIV06\_2019 0.00444568 0.0109753  
0.442206 0.0395943 0.00666112 0.00471895 0.433871 0.0102806  
0.786061 0.0102806 0.00472353 0.736038 0.00388997 0.00596808  
1.42027e-08 0.872742 0.872048 0.00527412 0.00541291 0.0109753  
0.0105585 0.00471895 0.00527924 0.0100028 0.00514032  
0.00471895 0.00583495 0.00596808 0.789415 0.997499 0.0109753  
0.0109753 0.00625174 0.0109753 0.0109753 0.0108363 0.00361211

## V. THE FIGURES IN THE MAIN PAPER TEXT

The Figures in the main paper text can not be expanded in hard copy. But the Supplementary Information (SI) is an on-line Appendix and can be enlarged. Hence we supply these Figures here.

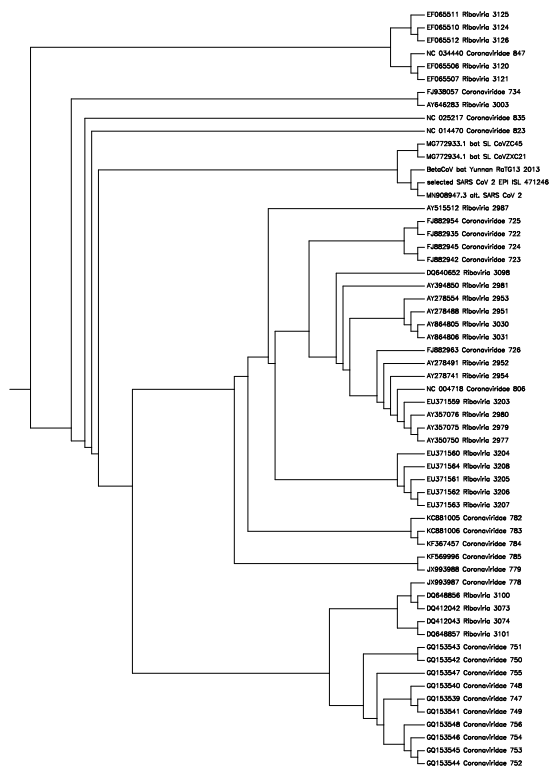

Figure S3. Figure 1 in the main text of the paper

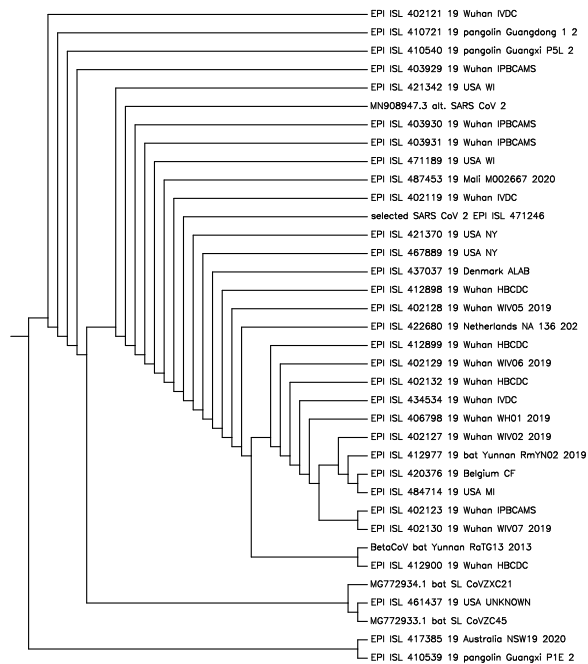

Figure S4. Figure 2 in the main text of the paper
